# Supplementary material for: Photocatalytic decarboxylative phosphorylation of N-aryl glycines
Source: Royal Society of Chemistry journal article supplement (doi:10.1039/d3qo01577g), 2023-12-05

## Photocatalytic decarboxylative phosphorylation of N-aryl glycines

Jiangwei Wen,<sup>\*,†</sup> Xue Sun,<sup>†</sup> Kelu Yan, Tingtao Yan, Zhen Liu, Yang Li, Jianjing, Yang\*

Key Laboratory of Green Natural Products and Pharmaceutical Intermediates in Colleges and Universities of Shandong Province, School of Chemistry and Chemical Engineering, Qufu Normal University, P. R. China.

E-mail: [wenjy@qfnu.edu.cn](mailto:wenjy@qfnu.edu.cn), [jjyang@whu.edu.cn](mailto:jjyang@whu.edu.cn)

<sup>†</sup> These authors contributed equally.

## 1. General information

All glassware was oven dried at 100 °C for hours and cooled down under vacuum. N-aryl glycine and phosphine oxide was prepared according to reported procedures.<sup>1</sup> Unless otherwise noted, materials were obtained from commercial suppliers and used without further purification. Thin layer chromatography (TLC) employed glass 0.25 mm silica gel plates. Flash chromatography columns were packed with 200-300 mesh silica gel in petroleum (b. p. 60-90 °C). <sup>1</sup>H, <sup>13</sup>C, and <sup>19</sup>F NMR data were recorded with Bruker Advance III (500 MHz) spectrometers with tetramethylsilane as an internal standard. All chemical shifts (δ) are reported in ppm and coupling constants (*J*) in Hz. All chemical shifts are reported relative to d-solvent peaks (77.00 ppm, chloroform).

## 2. General procedure for photocatalytic decarboxylative phosphorylation of N-aryl glycines

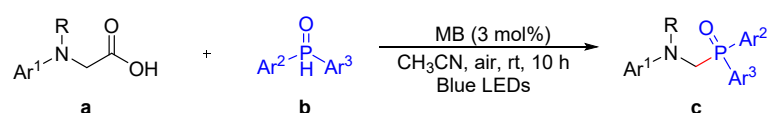

In an oven-dried reaction tube (10 mL) equipped with a stir bar, N-aryl glycines **a** (0.5 mmol) and phosphine oxides **b** (0.25 mmol), and MB (3 mol%) were combined and added. Then, CH<sub>3</sub>CN (2.0 mL) was slowly injected into the reaction tube. The reaction mixture was stirred and exposed to blue LED (460 nm) irradiation under room temperature for 10 h. When the reaction was finished, the reaction mixture was monitored by TLC and concentrated. The pure product was obtained by flash column chromatography on silica gel (petroleum/ethyl ether).

## 3. Radical inhibition experiments

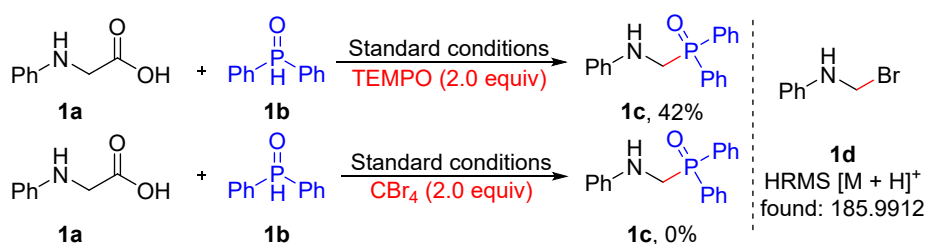

In an oven-dried reaction tube (10 mL) equipped with a stir bar, N-aryl glycines **a** (0.5 mmol) and phosphine oxides **b** (0.25 mmol), MB (3 mol%), and TEMPO or CBr<sub>4</sub> (0.5 mmol) were combined and added. Then, CH<sub>3</sub>CN (2.0 mL) was slowly injected into the reaction tube. The reaction mixture was stirred and exposed to blue LED (460 nm) irradiation under room temperature for 10 h. When the reaction was finished, the reaction mixture was monitored by TLC and concentrated. The solution was concentrated in a vacuum and the desired product **1c** was obtained in a 42% yield. The detection of free radical species **1d** by high-resolution mass spectrometry (HRMS) further

confirmed this reaction may be a radical pathway.

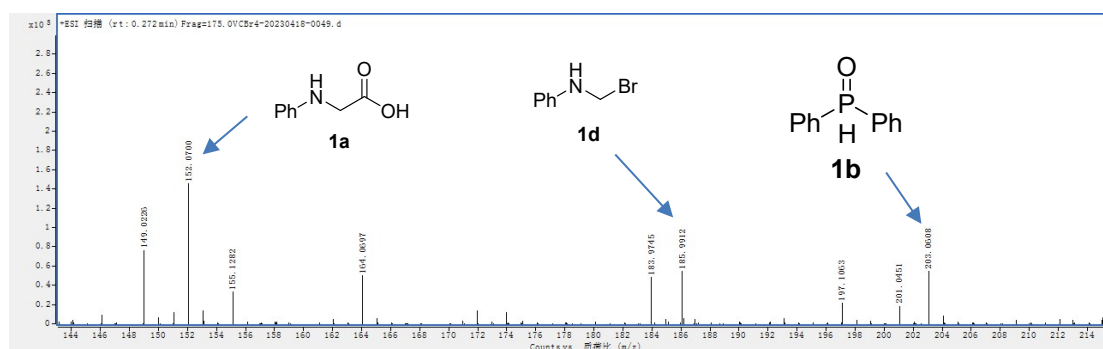

Figure S1. HRMS results of **1d**.

#### 4. Large-scale synthesis of **1c**.

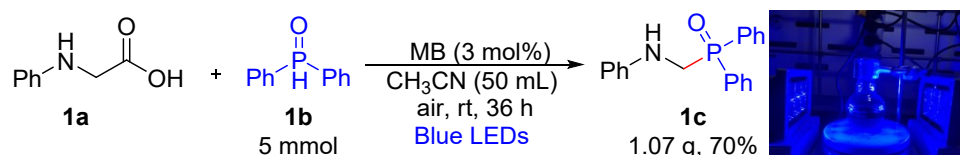

In an oven-dried round bottom flask (100 mL) equipped with a stir bar, phenylalanine **1a** (10.0 mmol) and diphenylphosphine oxide **1b** (5.0 mmol), and MB (3 mol%) were combined and added. Then, CH<sub>3</sub>CN (40.0 mL) was slowly injected into the round bottom flask. The reaction mixture was stirred and exposed to blue LED (460 nm) irradiation under room temperature for 36 h. When the reaction was finished, the reaction mixture was monitored by TLC and concentrated. The pure product **1c** (1.07 g, 70% yield) was obtained by flash column chromatography on silica gel (petroleum/ethyl ether = 1:1).

#### 5. Fluorescence quenching experiments

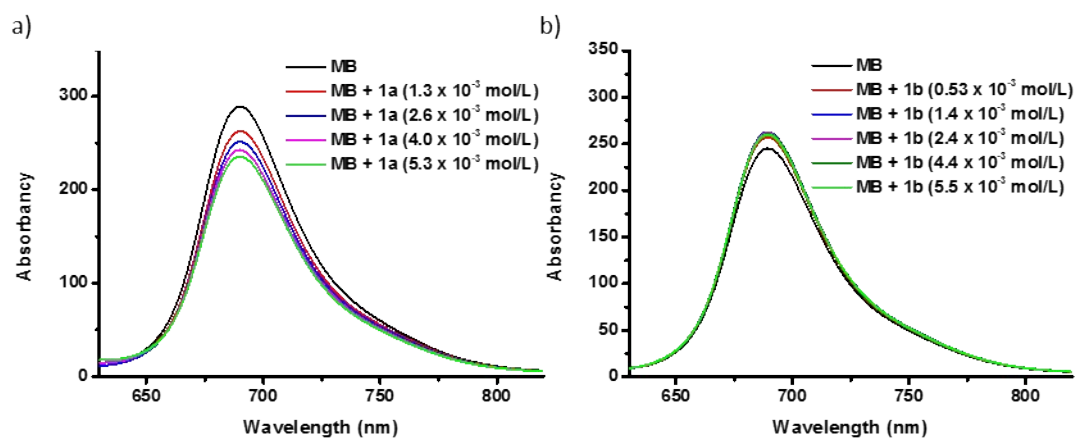

Quenching of MB fluorescence emission in the presence of **1a** or **1b**, the excitation wavelength was fixed at 425 nm, **MB** ( $1.0 \times 10^{-3}$  mol/L). a) Varying concentrations of **1a**. b) Varying concentrations of **1b**.

## 6. References

- (1) (a) Pe'try, N.; Vanderbeeken, T.; Malher, A.; Bringer, Y.; Retailleau, P.; Bantreil, X.; Lamaty F. *Chem. Commun.*, **2019**, 55, 9495-9498. (b) Li, C. J.; Lu, J.; Zhang, Z.-X.; Zhou, K.; Li, Y.; Qi, G. K. *Res. Chem. Intermed.* **2018**, 44, 4547-45462.

## 7. Detail descriptions for products

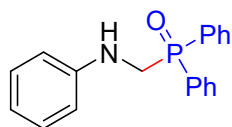

**diphenyl((phenylamino)methyl)phosphine oxide (1c)**: yellow solid was obtained with 79% isolated yield (60.6 mg). m. p.: 128.2-129.5 °C. <sup>1</sup>H NMR (500 MHz, CDCl<sub>3</sub>) δ 7.82 – 7.75 (m, 4H), 7.52 (td, *J* = 7.5, 1.2 Hz, 2H), 7.48 – 7.42 (m, 4H), 7.14 (t, *J* = 7.9 Hz, 2H), 6.73 (t, *J* = 7.3 Hz, 1H), 6.64 (d, *J* = 7.8 Hz, 2H), 4.38 (d, *J* = 5.7 Hz, 1H), 3.93 (dd, *J* = 8.5, 5.6 Hz, 2H). <sup>13</sup>C NMR (126 MHz, CDCl<sub>3</sub>) δ 147.7 (d, *J* = 11.0 Hz), 132.4 (d, *J* = 2.7 Hz), 131.2 (t, *J* = 8.0 Hz), 130.8 (d, *J* = 100.4 Hz), 129.2, 128.8 (d, *J* = 11.9 Hz), 118.6, 113.4, 43.8 (d, *J* = 79.0 Hz). HRMS (EI) calcd for C<sub>19</sub>H<sub>19</sub>NOP [M + H]<sup>+</sup>: 308.1199; found: 308.1198.

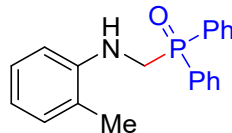

**diphenyl((o-tolylamino)methyl)phosphine oxide (2c)**: white solid was obtained with 85% isolated yield (68.2 mg). m. p.: 120.5-122.5 °C. <sup>1</sup>H NMR (500 MHz, CDCl<sub>3</sub>) δ 7.84 – 7.76 (m, 4H), 7.56 (td, *J* = 7.4, 1.0 Hz, 2H), 7.49 (td, *J* = 7.6, 2.8 Hz, 4H), 7.11 (t, *J* = 7.6 Hz, 1H), 7.04 (d, *J* = 7.3 Hz, 1H), 6.71 (t, *J* = 7.4 Hz, 1H), 6.65 (d, *J* = 8.0 Hz, 1H), 4.02 (s, 1H), 3.95 (d, *J* = 9.2 Hz, 2H), 2.07 (s, 3H). <sup>13</sup>C NMR (126 MHz, CDCl<sub>3</sub>) δ 145.6 (d, *J* = 11.0 Hz), 132.4 (d, *J* = 2.7 Hz), 131.1 (d, *J* = 100.1 Hz), 131.1 (d, *J* = 9.5 Hz), 130.2, 128.8 (d, *J* = 11.8 Hz), 127.0, 123.4, 118.4, 110.3, 43.8 (d, *J* = 78.6 Hz), 17.3. HRMS (EI) calcd for C<sub>20</sub>H<sub>21</sub>NOP [M + H]<sup>+</sup>: 322.1355; found: 322.1354.

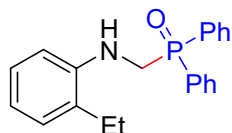

**(((2-ethylphenyl)amino)methyl)diphenylphosphine oxide (3c)**: white solid was obtained with 75% isolated yield (62.8 mg). m. p.: 105-107 °C. <sup>1</sup>H NMR (500 MHz, CDCl<sub>3</sub>) δ 7.72 (dd, *J* = 11.6, 7.3 Hz, 4H), 7.47 (t, *J* = 7.1 Hz, 2H), 7.40 (td, *J* = 7.6, 2.6 Hz, 4H), 7.03 (t, *J* = 7.7 Hz, 1H), 6.97 (d, *J* = 7.3

Hz, 1H), 6.67 (t,  $J = 7.4$  Hz, 1H), 6.59 (d,  $J = 8.0$  Hz, 1H), 4.02 (s, 1H), 3.86 (dd,  $J = 9.2, 5.2$  Hz, 2H), 2.33 (q,  $J = 7.5$  Hz, 2H), 1.02 (t,  $J = 7.5$  Hz, 3H).  $^{13}\text{C}$  NMR (126 MHz,  $\text{CDCl}_3$ )  $\delta$  145.0 (d,  $J = 11.1$  Hz), 132.4 (d,  $J = 2.7$  Hz), 131.2 (d,  $J = 100.0$  Hz), 131.1 (d,  $J = 9.5$  Hz), 129.1, 128.8 (d,  $J = 11.8$  Hz), 128.1, 126.9, 118.6, 110.6, 43.9 (d,  $J = 78.7$  Hz), 23.8, 12.8. HRMS (EI) calcd for  $\text{C}_{21}\text{H}_{23}\text{NOP}$   $[\text{M} + \text{H}]^+$ : 336.1512; found: 336.1511.

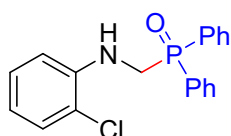

**(((2-chlorophenyl)amino)methyl)diphenylphosphine oxide (4c)**: white solid was obtained with 65% isolated yield (55.4 mg). m. p.: 132-134 °C.  $^1\text{H}$  NMR (500 MHz,  $\text{CDCl}_3$ )  $\delta$  7.83 – 7.78 (m, 4H), 7.57 (dd,  $J = 10.6, 4.2$  Hz, 2H), 7.49 (td,  $J = 7.5, 2.6$  Hz, 4H), 7.23 – 7.18 (m, 1H), 7.10 (dd,  $J = 11.4, 4.1$  Hz, 1H), 6.74 – 6.60 (m, 2H), 4.70 (d,  $J = 5.3$  Hz, 1H), 3.98 (dd,  $J = 8.9, 5.4$  Hz, 2H).  $^{13}\text{C}$  NMR (126 MHz,  $\text{CDCl}_3$ )  $\delta$  143.3 (d,  $J = 9.6$  Hz), 132.5 (d,  $J = 2.7$  Hz), 131.2 (d,  $J = 9.5$  Hz), 130.8 (d,  $J = 109.4$  Hz), 129.2, 128.8 (d,  $J = 11.8$  Hz), 127.7, 120.1, 118.6, 111.8, 43.9 (d,  $J = 78.2$  Hz). HRMS (EI) calcd for  $\text{C}_{19}\text{H}_{18}\text{ClNOP}$   $[\text{M} + \text{H}]^+$ : 342.0809; found: 342.0807.

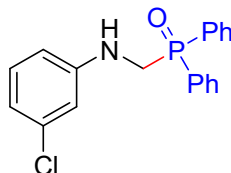

**(((3-chlorophenyl)amino)methyl)diphenylphosphine oxide (5c)**: white solid was obtained with 64% isolated yield (54.5 mg). m. p.: 149-150 °C.  $^1\text{H}$  NMR (500 MHz,  $\text{CDCl}_3$ )  $\delta$  7.82 – 7.73 (m, 4H), 7.70 (dd,  $J = 13.8, 7.2$  Hz, 2H), 7.60 – 7.54 (m, 2H), 7.52 – 7.45 (m, 3H), 7.04 (t,  $J = 8.0$  Hz, 1H), 6.69 (dd,  $J = 7.9, 0.9$  Hz, 1H), 6.60 (t,  $J = 1.9$  Hz, 1H), 6.52 (dd,  $J = 8.2, 2.1$  Hz, 1H), 4.48 (s, 1H), 3.90 (d,  $J = 7.1$  Hz, 2H).  $^{13}\text{C}$  NMR (126 MHz,  $\text{CDCl}_3$ )  $\delta$  148.7 (d,  $J = 10.4$  Hz), 135.0, 132.5 (d,  $J = 2.7$  Hz), 131.0 (d,  $J = 9.6$  Hz), 130.6 (d,  $J = 101.8$  Hz), 130.1, 128.9 (d,  $J = 11.9$  Hz), 118.4, 112.9, 112.0, 43.6 (d,  $J = 78.2$  Hz). HRMS (EI) calcd for  $\text{C}_{19}\text{H}_{18}\text{ClNOP}$   $[\text{M} + \text{H}]^+$ : 342.0809; found: 342.0807.

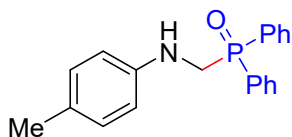

**diphenyl((p-tolylamino)methyl)phosphine oxide (6c)**: white solid was obtained with 78% isolated yield (62.6 mg). m. p.: 161-162 °C.  $^1\text{H}$  NMR (500 MHz,  $\text{CDCl}_3$ )  $\delta$  7.74 – 7.68 (m, 4H), 7.47

(t,  $J = 6.9$  Hz, 2H), 7.39 (td,  $J = 7.6, 2.8$  Hz, 4H), 6.90 (d,  $J = 8.3$  Hz, 2H), 6.50 (d,  $J = 8.3$  Hz, 2H), 4.05 (d,  $J = 4.0$  Hz, 1H), 3.83 (d,  $J = 8.8$  Hz, 2H), 2.14 (s, 3H).  $^{13}\text{C}$  NMR (126 MHz,  $\text{CDCl}_3$ )  $\delta$  145.3 (d,  $J = 11.6$  Hz), 132.3 (d,  $J = 2.7$  Hz), 131.2 (d,  $J = 100.0$  Hz), 131.1 (d,  $J = 9.4$  Hz), 129.7, 128.8 (d,  $J = 11.8$  Hz), 127.9, 113.6, 44.2 (d,  $J = 79.2$  Hz), 20.4. HRMS (EI) calcd for  $\text{C}_{20}\text{H}_{21}\text{NOP}$   $[\text{M} + \text{H}]^+$ : 322.1355; found: 322.1354.

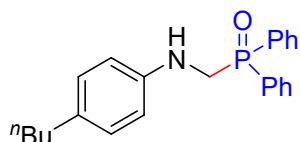

**(((4-butylphenyl)amino)methyl)diphenylphosphine oxide (7c):** white solid was obtained with 66% isolated yield (59.9 mg). m. p.: 110-112 °C.  $^1\text{H}$  NMR (500 MHz,  $\text{CDCl}_3$ )  $\delta$  7.86 – 7.71 (m, 4H), 7.54 (td,  $J = 7.4, 1.1$  Hz, 2H), 7.47 (td,  $J = 7.5, 2.8$  Hz, 4H), 6.98 (d,  $J = 8.3$  Hz, 2H), 6.59 (d,  $J = 8.4$  Hz, 2H), 4.15 (d,  $J = 4.5$  Hz, 1H), 3.91 (d,  $J = 8.4$  Hz, 2H), 2.48 (t,  $J = 7.6$  Hz, 2H), 1.58 – 1.46 (m, 2H), 1.38 – 1.25 (m, 2H), 0.90 (t,  $J = 7.3$  Hz, 3H).  $^{13}\text{C}$  NMR (126 MHz,  $\text{CDCl}_3$ )  $\delta$  145.5 (d,  $J = 11.6$  Hz), 133.2, 132.3 (d,  $J = 2.7$  Hz), 131.2 (d,  $J = 99.9$  Hz), 131.1 (d,  $J = 9.5$  Hz), 129.1, 128.8 (d,  $J = 11.9$  Hz), 113.5, 44.2 (d,  $J = 79.1$  Hz), 34.7, 33.9, 22.3, 14.0. HRMS (EI) calcd for  $\text{C}_{23}\text{H}_{27}\text{NOP}$   $[\text{M} + \text{H}]^+$ : 364.1825; found: 364.1824.

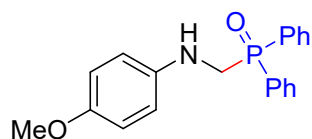

**(((4-methoxyphenyl)amino)methyl)diphenylphosphine oxide (8c):** Yellow liquid was obtained with 65% isolated yield (54.7 mg).  $^1\text{H}$  NMR (500 MHz,  $\text{CDCl}_3$ )  $\delta$  7.77 – 7.66 (m, 4H), 7.50 – 7.45 (m, 2H), 7.40 (td,  $J = 7.5, 2.8$  Hz, 4H), 6.67 (d,  $J = 8.9$  Hz, 2H), 6.55 (d,  $J = 8.9$  Hz, 2H), 4.04 (d,  $J = 7.1$  Hz, 1H), 3.82 (d,  $J = 8.6$  Hz, 2H), 3.65 (s, 3H).  $^{13}\text{C}$  NMR (126 MHz,  $\text{CDCl}_3$ )  $\delta$  152.9, 141.8 (d,  $J = 11.8$  Hz), 132.3 (d,  $J = 2.8$  Hz), 131.1 (d,  $J = 9.5$  Hz), 131.0 (d,  $J = 100.0$  Hz), 128.8 (d,  $J = 11.9$  Hz), 114.8, 114.8, 55.7, 44.9 (d,  $J = 79.1$  Hz). HRMS (EI) calcd for  $\text{C}_{20}\text{H}_{21}\text{NO}_2\text{P}$   $[\text{M} + \text{H}]^+$ : 338.1304; found: 338.1303

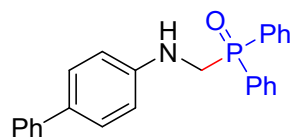

**(((1,1'-biphenyl)-4-ylamino)methyl)diphenylphosphine oxide (9c):** white solid was obtained with 68% isolated yield (65.1 mg). m. p.: 160-162 °C.  $^1\text{H}$  NMR (500 MHz,  $\text{CDCl}_3$ )  $\delta$  7.76 – 7.69 (m, 4H), 7.48 (td,  $J = 7.5, 1.2$  Hz, 2H), 7.45 – 7.38 (m, 6H), 7.35 – 7.27 (m, 4H), 7.17 (dd,  $J = 8.7, 6.0$  Hz,

1H), 6.65 (d,  $J = 8.6$  Hz, 2H), 4.34 (s, 1H), 3.89 (d,  $J = 8.6$  Hz, 2H).  $^{13}\text{C}$  NMR (126 MHz,  $\text{CDCl}_3$ )  $\delta$  147.0 (d,  $J = 10.9$  Hz), 140.9, 132.4 (d,  $J = 2.8$  Hz), 131.6, 131.1 (d,  $J = 9.5$  Hz), 131.0 (d,  $J = 100.3$  Hz), 128.9 (d,  $J = 11.9$  Hz), 128.7, 127.9, 126.4, 126.3, 113.7, 43.9 (d,  $J = 78.6$  Hz). HRMS (EI) calcd for  $\text{C}_{25}\text{H}_{23}\text{NOP}$   $[\text{M} + \text{H}]^+$ : 384.1512; found: 384.1511.

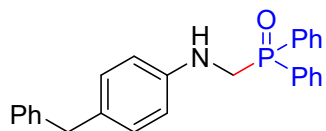

**(((4-benzylphenyl)amino)methyl)diphenylphosphine oxide (10c)**: white solid was obtained with 70% isolated yield (69.4 mg). m. p.: 143-145 °C.  $^1\text{H}$  NMR (500 MHz,  $\text{CDCl}_3$ )  $\delta$  7.81 – 7.72 (m, 4H), 7.53 (td,  $J = 7.5$ , 1.1 Hz, 2H), 7.45 (td,  $J = 7.6$ , 2.8 Hz, 4H), 7.25 (t,  $J = 7.5$  Hz, 2H), 7.15 (dd,  $J = 11.3$ , 7.6 Hz, 3H), 6.98 (d,  $J = 8.3$  Hz, 2H), 6.58 (d,  $J = 8.4$  Hz, 2H), 4.20 (d,  $J = 5.7$  Hz, 1H), 3.90 (dd,  $J = 8.6$ , 5.6 Hz, 2H), 3.85 (s, 2H).  $^{13}\text{C}$  NMR (126 MHz,  $\text{CDCl}_3$ )  $\delta$  145.9 (d,  $J = 11.2$  Hz), 141.8, 132.3 (d,  $J = 2.7$  Hz), 131.3, 131.2 (d,  $J = 100.0$  Hz), 131.1 (d,  $J = 9.5$  Hz), 129.7, 128.8 (d,  $J = 12.0$  Hz), 128.7, 128.3, 125.9, 113.7, 44.1 (d,  $J = 78.8$  Hz), 41.0. HRMS (EI) calcd for  $\text{C}_{26}\text{H}_{25}\text{NOP}$   $[\text{M} + \text{H}]^+$ : 398.1168; found: 398.1167.

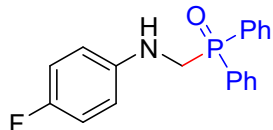

**(((4-fluorophenyl)amino)methyl)diphenylphosphine oxide (11c)**: white solid was obtained with 70% isolated yield (56.8 mg). m. p.: 139-140.5 °C.  $^1\text{H}$  NMR (500 MHz,  $\text{CDCl}_3$ )  $\delta$  7.81 – 7.75 (m, 4H), 7.57 (td,  $J = 7.4$ , 1.2 Hz, 2H), 7.49 (td,  $J = 7.6$ , 2.9 Hz, 4H), 6.86 (t,  $J = 8.7$  Hz, 2H), 6.59 (dd,  $J = 8.9$ , 4.3 Hz, 2H), 4.13 (d,  $J = 3.4$  Hz, 1H), 3.88 (d,  $J = 8.6$  Hz, 2H).  $^{13}\text{C}$  NMR (126 MHz,  $\text{CDCl}_3$ )  $\delta$  156.4 (d,  $J = 236.5$  Hz), 144.0 (dd,  $J = 11.3$ , 2.0 Hz), 132.4 (d,  $J = 2.8$  Hz), 131.1 (d,  $J = 9.5$  Hz), 131.0 (d,  $J = 100.0$  Hz), 128.8 (d,  $J = 11.9$  Hz), 115.6 (d,  $J = 22.6$  Hz), 114.4 (d,  $J = 7.6$  Hz), 44.6 (d,  $J = 78.4$  Hz).  $^{19}\text{F}$  NMR (471 MHz,  $\text{CDCl}_3$ )  $\delta$  -126.4. HRMS (EI) calcd for  $\text{C}_{19}\text{H}_{18}\text{FNOP}$   $[\text{M} + \text{H}]^+$ : 326.1105; found: 326.1104.

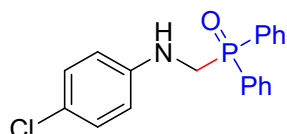

**(((4-chlorophenyl)amino)methyl)diphenylphosphine oxide (12c)**: white solid was obtained with 83% isolated yield (70.7 mg). m. p.: 172-173.5 °C.  $^1\text{H}$  NMR (500 MHz,  $\text{CDCl}_3$ )  $\delta$  7.74 – 7.64 (m, 4H),

7.49 (td,  $J = 7.4, 1.3$  Hz, 2H), 7.41 (td,  $J = 7.5, 2.9$  Hz, 4H), 7.01 (d,  $J = 8.8$  Hz, 2H), 6.49 (d,  $J = 8.9$  Hz, 2H), 4.31 (s, 1H), 3.81 (d,  $J = 8.4$  Hz, 2H).  $^{13}\text{C}$  NMR (126 MHz,  $\text{CDCl}_3$ )  $\delta$  146.2 (d,  $J = 10.8$  Hz), 132.5 (d,  $J = 2.8$  Hz), 131.1 (d,  $J = 9.5$  Hz), 130.8 (d,  $J = 100.4$  Hz), 129.0, 128.9 (d,  $J = 11.8$  Hz), 123.2, 114.5, 44.0 (d,  $J = 78.1$  Hz). HRMS (EI) calcd for  $\text{C}_{19}\text{H}_{18}\text{ClNOP}$   $[\text{M} + \text{H}]^+$ : 342.0809; found: 342.0807.

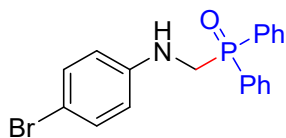

**(((4-bromophenyl)amino)methyl)diphenylphosphine oxide (13c)**: white solid was obtained with 69% isolated yield (66.4 mg). m. p.: 72-74 °C.  $^1\text{H}$  NMR (500 MHz,  $\text{CDCl}_3$ )  $\delta$  7.78 – 7.73 (m, 4H), 7.56 (td,  $J = 7.4, 1.0$  Hz, 2H), 7.47 (td,  $J = 7.6, 2.8$  Hz, 4H), 7.21 (d,  $J = 8.7$  Hz, 2H), 6.52 (d,  $J = 8.8$  Hz, 2H), 4.43 (s, 1H), 3.87 (d,  $J = 8.4$  Hz, 2H).  $^{13}\text{C}$  NMR (126 MHz,  $\text{CDCl}_3$ )  $\delta$  146.7 (d,  $J = 10.6$  Hz), 132.5 (d,  $J = 2.9$  Hz), 131.9, 131.1 (d,  $J = 9.5$  Hz), 130.8 (d,  $J = 100.3$  Hz), 128.9 (d,  $J = 11.8$  Hz), 115.0, 110.3, 43.8 (d,  $J = 78.2$  Hz). HRMS (EI) calcd for  $\text{C}_{19}\text{H}_{18}\text{BrNOP}$   $[\text{M} + \text{H}]^+$ : 386.0304; found: 386.0303.

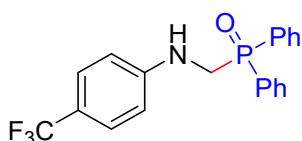

**diphenyl(((4-(trifluoromethyl)phenyl)amino)methyl)phosphine oxide (14c)**: white solid was obtained with 63% isolated yield (59 mg). m. p.: 149-151 °C.  $^1\text{H}$  NMR (500 MHz,  $\text{CDCl}_3$ )  $\delta$  7.81 – 7.73 (m, 4H), 7.58 (t,  $J = 7.4$  Hz, 2H), 7.52 – 7.45 (m, 4H), 7.38 (d,  $J = 8.4$  Hz, 2H), 6.66 (d,  $J = 8.4$  Hz, 2H), 4.75 (s, 1H), 3.95 (d,  $J = 8.4$  Hz, 2H).  $^{13}\text{C}$  NMR (126 MHz,  $\text{CDCl}_3$ )  $\delta$  150.1 (d,  $J = 9.9$  Hz), 132.5 (d,  $J = 2.8$  Hz), 131.0 (d,  $J = 9.5$  Hz), 130.6 (d,  $J = 100.6$  Hz), 128.9 (d,  $J = 12.0$  Hz), 126.5 (q,  $J = 3.8$  Hz), 124.7 (q,  $J = 270.3$  Hz), 120.1 (d,  $J = 32.8$  Hz), 112.6, 43.3 (d,  $J = 77.6$  Hz).  $^{19}\text{F}$  NMR (471 MHz,  $\text{CDCl}_3$ )  $\delta$  -61.2. HRMS (EI) calcd for  $\text{C}_{20}\text{H}_{18}\text{F}_3\text{NOP}$   $[\text{M} + \text{H}]^+$ : 376.1073; found: 376.1072.

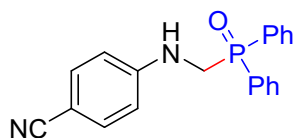

**4-(((diphenylphosphoryl)methyl)amino)benzonitrile (15c)**: yellow solid was obtained with 35% isolated yield (29 mg). m. p.: 189-191 °C.  $^1\text{H}$  NMR (500 MHz,  $\text{CDCl}_3$ )  $\delta$  7.76 (dd,  $J = 10.9, 7.9$  Hz, 4H), 7.59 (t,  $J = 7.4$  Hz, 2H), 7.50 (t,  $J = 7.0$  Hz, 4H), 7.39 (d,  $J = 8.7$  Hz, 2H), 5.10 (s, 1H), 3.96 (d,  $J = 3.6$  Hz, 2H).  $^{13}\text{C}$  NMR (126 MHz,  $\text{CDCl}_3$ )  $\delta$  150.8 (d,  $J = 8.5$  Hz), 133.6, 132.7 (d,  $J = 1.9$  Hz), 131.0 (d,  $J = 9.2$  Hz), 130.5 (d,  $J = 101.7$  Hz), 129.0 (d,  $J = 11.6$  Hz), 120.0, 112.9, 100.2, 43.1 (d,  $J = 76.6$  Hz).



HRMS (EI) calcd for  $C_{20}H_{18}N_2OP$   $[M + H]^+$ : 333.1151; found: 333.1151.

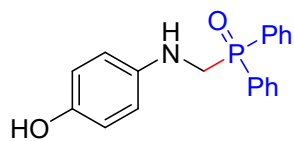

**(((4-hydroxyphenyl)amino)methyl)diphenylphosphine oxide (16c)**: white solid was obtained with 50% isolated yield (40.3 mg). m. p.: 62-64 °C.  $^1H$  NMR (500 MHz,  $CDCl_3$ )  $\delta$  7.79 (dd,  $J = 10.3$ , 8.0 Hz, 4H), 7.54 (t,  $J = 7.4$  Hz, 2H), 7.49 – 7.45 (m, 4H), 6.67 (d,  $J = 9.0$  Hz, 2H), 6.64 (d,  $J = 9.1$  Hz, 2H), 4.33 (s, 1H), 3.92 (s, 2H).  $^{13}C$  NMR (126 MHz,  $CDCl_3$ )  $\delta$  150.4, 142.3 (d,  $J = 2.4$  Hz), 132.2, 131.2 (d,  $J = 9.1$  Hz), 131.1 (d,  $J = 103.2$  Hz), 128.7 (d,  $J = 11.3$  Hz), 117.12, 116.0, 53.9 (d,  $J = 65.3$  Hz).

HRMS (EI) calcd for  $C_{19}H_{19}NO_2P$   $[M + H]^+$ : 324.1148; found: 324.1147.

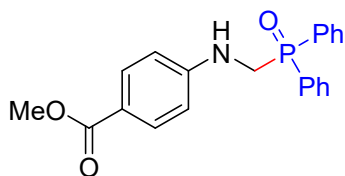

**methyl 4-(((diphenylphosphoryl)methyl)amino)benzoate (17c)**: white solid was obtained with 72% isolated yield (65.7 mg). m. p.: 200-201 °C.  $^1H$  NMR (500 MHz,  $CDCl_3$ )  $\delta$  7.74 (d,  $J = 8.5$  Hz, 2H), 7.69 (dd,  $J = 11.4$ , 7.6 Hz, 4H), 7.47 (t,  $J = 7.2$  Hz, 2H), 7.39 (t,  $J = 6.5$  Hz, 4H), 6.53 (d,  $J = 8.7$  Hz, 2H), 4.94 (s, 1H), 3.90 (dd,  $J = 7.6$ , 3.7 Hz, 2H), 3.74 (s, 3H).  $^{13}C$  NMR (126 MHz,  $CDCl_3$ )  $\delta$  167.0, 151.4 (d,  $J = 9.1$  Hz), 132.5 (d,  $J = 2.7$  Hz), 131.3, 131.0 (d,  $J = 9.5$  Hz), 130.7 (d,  $J = 101.2$  Hz), 128.9 (d,  $J = 11.9$  Hz), 119.6, 112.1, 51.5, 43.3 (d,  $J = 77.4$  Hz). HRMS (EI) calcd for  $C_{21}H_{21}NO_3P$   $[M + H]^+$ : 366.1254; found: 366.1253.

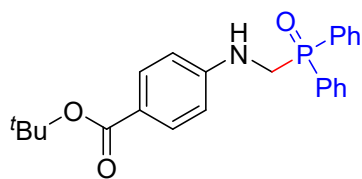

**tert-butyl 4-(((diphenylphosphoryl)methyl)amino)benzoate (18c)**: white solid was obtained with 81% isolated yield (82.4 mg). m. p.: 170-172 °C.  $^1H$  NMR (500 MHz,  $CDCl_3$ )  $\delta$  7.81 – 7.73 (m, 6H), 7.56 (t,  $J = 7.3$  Hz, 2H), 7.51 – 7.44 (m, 4H), 6.59 (d,  $J = 8.7$  Hz, 2H), 4.81 (d,  $J = 5.4$  Hz, 1H), 3.97 (d,  $J = 7.6$  Hz, 2H), 1.55 (s, 9H).  $^{13}C$  NMR (126 MHz,  $CDCl_3$ )  $\delta$  165.9, 150.9 (d,  $J = 9.5$  Hz), 132.5 (d,  $J = 2.6$  Hz), 131.2, 131.0 (d,  $J = 9.5$  Hz), 130.7 (d,  $J = 106.4$  Hz), 128.9 (d,  $J = 12.0$  Hz), 121.7, 112.1, 80.0, 43.2 (d,  $J = 77.6$  Hz), 28.3. HRMS (EI) calcd for  $C_{24}H_{27}NO_3P$   $[M + H]^+$ : 408.1723; found: 408.1720.

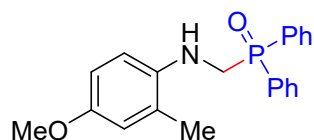

**(((4-methoxy-2-methylphenyl)amino)methyl)diphenylphosphine oxide (19c):** yellow solid was obtained with 87% isolated yield (76.3 mg). m. p.: 67-69 °C.  $^1\text{H}$  NMR (500 MHz,  $\text{CDCl}_3$ )  $\delta$  7.83 – 7.77 (m, 4H), 7.59 – 7.54 (m, 2H), 7.53 – 7.46 (m, 4H), 6.67 (s, 1H), 6.65 (d,  $J = 2.8$  Hz, 1H), 6.59 (d,  $J = 8.3$  Hz, 1H), 3.91 (d,  $J = 8.9$  Hz, 2H), 3.72 (s, 3H), 2.06 (s, 3H).  $^{13}\text{C}$  NMR (126 MHz,  $\text{CDCl}_3$ )  $\delta$  152.7, 139.7 (d,  $J = 11.7$  Hz), 132.4 (d,  $J = 2.9$  Hz), 131.1 (d,  $J = 9.5$  Hz), 131.0 (d,  $J = 100.0$  Hz), 128.8 (d,  $J = 11.8$  Hz), 125.5, 117.0, 111.9, 111.4, 55.7, 44.7 (d,  $J = 79.1$  Hz), 17.5. HRMS (EI) calcd for  $\text{C}_{21}\text{H}_{23}\text{NO}_2\text{P}$   $[\text{M} + \text{H}]^+$ : 352.1461; found: 352.1460.

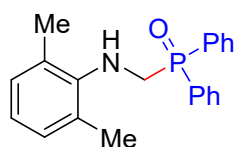

**(((2,6-dimethylphenyl)amino)methyl)diphenylphosphine oxide (20c):** yellow oil was obtained with 33% isolated yield (27.6 mg).  $^1\text{H}$  NMR (500 MHz,  $\text{CDCl}_3$ )  $\delta$  7.79 (dd,  $J = 11.4, 7.5$  Hz, 4H), 7.54 (t,  $J = 7.4$  Hz, 2H), 7.49 – 7.45 (m, 4H), 6.91 (d,  $J = 7.0$  Hz, 2H), 6.79 (t,  $J = 7.5$  Hz, 1H), 4.00 (d,  $J = 3.3$  Hz, 1H), 3.81 (d,  $J = 7.5$  Hz, 2H), 2.17 (s, 6H).  $^{13}\text{C}$  NMR (126 MHz,  $\text{CDCl}_3$ )  $\delta$  145.3 (d,  $J = 10.2$  Hz), 132.2 (d,  $J = 2.7$  Hz), 132.2 (d,  $J = 2.7$  Hz), 131.5 (d,  $J = 100.4$  Hz), 131.1 (d,  $J = 9.5$  Hz), 128.8, 128.6 (d,  $J = 11.7$  Hz), 48.0 (d,  $J = 74.3$  Hz), 18.2. HRMS (EI) calcd for  $\text{C}_{21}\text{H}_{23}\text{NOP}$   $[\text{M} + \text{H}]^+$ : 336.1512; found: 336.1510.

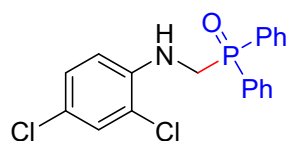

**(((2,4-dichlorophenyl)amino)methyl)diphenylphosphine oxide (21c):** white solid was obtained with 53% isolated yield (49.6 mg). m. p.: 169-170 °C.  $^1\text{H}$  NMR (500 MHz,  $\text{CDCl}_3$ )  $\delta$  7.84 – 7.75 (m, 4H), 7.58 (td,  $J = 7.4, 1.1$  Hz, 2H), 7.50 (td,  $J = 7.6, 2.9$  Hz, 4H), 7.22 (s, 1H), 7.06 (dd,  $J = 8.7, 2.4$  Hz, 1H), 6.62 (d,  $J = 8.7$  Hz, 1H), 4.71 (d,  $J = 5.7$  Hz, 1H), 3.95 (dd,  $J = 8.5, 5.6$  Hz, 2H).  $^{13}\text{C}$  NMR (126 MHz,  $\text{CDCl}_3$ )  $\delta$  142.2 (d,  $J = 9.1$  Hz), 132.5 (d,  $J = 2.7$  Hz), 131.1 (d,  $J = 9.5$  Hz), 130.6 (d,  $J = 100.0$  Hz), 128.9 (d,  $J = 11.9$  Hz), 128.8, 127.6, 122.6, 120.4, 112.4, 44.0 (d,  $J = 77.6$  Hz). HRMS (EI) calcd for  $\text{C}_{19}\text{H}_{17}\text{Cl}_2\text{NOP}$   $[\text{M} + \text{H}]^+$ : 376.0419; found: 376.0417.

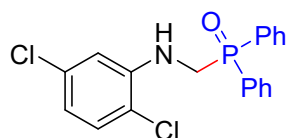

**(((2,5-dichlorophenyl)amino)methyl)diphenylphosphine oxide (22c):** white solid was obtained with 42% isolated yield (39.3 mg). m. p.: 148-150 °C.  $^1\text{H}$  NMR (500 MHz,  $\text{CDCl}_3$ )  $\delta$  7.84 – 7.77 (m, 4H), 7.59 (td,  $J = 7.4, 1.3$  Hz, 2H), 7.54 – 7.48 (m, 4H), 7.12 (d,  $J = 8.9$  Hz, 1H), 6.64 – 6.62 (m, 1H), 6.62 (s, 1H), 4.86 (d,  $J = 5.6$  Hz, 1H), 3.94 (dd,  $J = 8.7, 5.5$  Hz, 2H).  $^{13}\text{C}$  NMR (126 MHz,  $\text{CDCl}_3$ )  $\delta$  144.2 (d,  $J = 9.4$  Hz), 133.4, 132.6 (d,  $J = 2.7$  Hz), 131.1 (d,  $J = 9.5$  Hz), 130.5 (d,  $J = 100.4$  Hz), 129.9, 128.9 (d,  $J = 11.8$  Hz), 118.2, 118.2, 111.7, 43.6 (d,  $J = 77.4$  Hz). HRMS (EI) calcd for  $\text{C}_{19}\text{H}_{17}\text{Cl}_2\text{NOP}$  [ $\text{M} + \text{H}$ ] $^+$ : 376.0419; found: 376.0417.

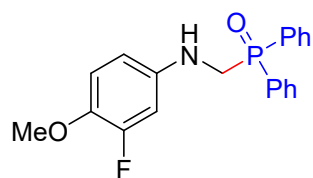

**(((3-fluoro-4-methoxyphenyl)amino)methyl)diphenylphosphine oxide (23c):** yellow oil was obtained with 72% isolated yield (63.9 mg).  $^1\text{H}$  NMR (500 MHz,  $\text{CDCl}_3$ )  $\delta$  7.79 – 7.71 (m, 4H), 7.57 (dd,  $J = 10.8, 4.1$  Hz, 2H), 7.49 (td,  $J = 7.6, 2.8$  Hz, 4H), 6.79 (t,  $J = 9.1$  Hz, 1H), 6.43 (dd,  $J = 13.1, 2.7$  Hz, 1H), 6.36 (d,  $J = 8.8$  Hz, 1H), 3.88 (d,  $J = 8.2$  Hz, 2H), 3.78 (s, 3H).  $^{13}\text{C}$  NMR (126 MHz,  $\text{CDCl}_3$ )  $\delta$  153.3 (d,  $J = 244.6$  Hz), 142.5 (dd,  $J = 11.0, 9.0$  Hz), 140.3 (d,  $J = 11.2$  Hz), 132.6 (d,  $J = 2.8$  Hz), 131.0 (d,  $J = 9.7$  Hz), 130.1 (d,  $J = 100.9$  Hz), 128.9 (d,  $J = 11.9$  Hz), 115.7 (d,  $J = 3.2$  Hz), 108.8 (d,  $J = 3.3$  Hz), 102.6 (d,  $J = 22.2$  Hz), 57.3, 44.5 (d,  $J = 78.8$  Hz).  $^{19}\text{F}$  NMR (471 MHz,  $\text{CDCl}_3$ )  $\delta$  -75.5. HRMS (EI) calcd for  $\text{C}_{20}\text{H}_{20}\text{NO}_2\text{P}$  [ $\text{M} + \text{H}$ ] $^+$ : 356.1210; found: 356.1209.

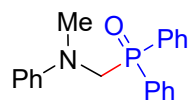

**(((methyl(phenyl)amino)methyl)diphenylphosphine oxide (24)** white solid was obtained with 54% isolated yield (43.3 mg).  $^1\text{H}$  NMR (500 MHz,  $\text{CDCl}_3$ )  $\delta$  7.84 – 7.78 (m, 4H), 7.56 – 7.51 (m, 2H), 7.49 – 7.43 (m, 4H), 7.13 (t,  $J = 8.0$  Hz, 2H), 6.70 (dd,  $J = 12.7, 7.9$  Hz, 3H), 4.20 (d,  $J = 3.7$  Hz, 2H), 2.93 (s, 3H).  $^{13}\text{C}$  NMR (126 MHz,  $\text{CDCl}_3$ )  $\delta$  149.9 (d,  $J = 3.1$  Hz), 132.1 (d,  $J = 2.7$  Hz), 131.5 (d,  $J = 94.7$  Hz), 131.3 (d,  $J = 9.1$  Hz), 128.9, 128.6 (d,  $J = 11.3$  Hz), 117.9, 113.4, 55.3 (d,  $J = 82.9$  Hz), 39.9. HRMS (EI) calcd for  $\text{C}_{20}\text{H}_{21}\text{NOP}$  [ $\text{M} + \text{H}$ ] $^+$ : 322.1352; found: 322.1351.

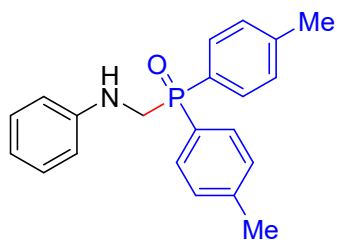

**((phenylamino)methyl)di-p-tolylphosphine oxide (25c):** white solid was obtained with 75% isolated yield (62.8 mg). m. p.: 120-122 °C. <sup>1</sup>H NMR (500 MHz, CDCl<sub>3</sub>) δ 7.66 (dd, *J* = 11.5, 8.1 Hz, 4H), 7.28 (dd, *J* = 7.9, 2.2 Hz, 4H), 7.16 (dd, *J* = 8.3, 7.5 Hz, 2H), 6.74 (t, *J* = 7.3 Hz, 1H), 6.64 (d, *J* = 7.8 Hz, 2H), 4.26 (s, 1H), 3.88 (d, *J* = 9.0 Hz, 2H), 2.39 (s, 6H). <sup>13</sup>C NMR (126 MHz, CDCl<sub>3</sub>) δ 147.7 (d, *J* = 11.3 Hz), 142.8 (d, *J* = 2.7 Hz), 131.1 (d, *J* = 9.9 Hz), 129.5 (d, *J* = 12.2 Hz), 129.2, 127.9 (d, *J* = 102.7 Hz), 118.5, 113.4, 44.0 (d, *J* = 78.9 Hz), 21.6. HRMS (EI) calcd for C<sub>27</sub>H<sub>23</sub>NOP [M + H]<sup>+</sup>: 408.1512; found: 408.1511.

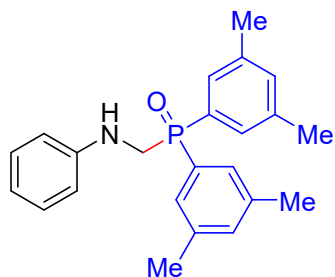

**bis(3,5-dimethylphenyl)((phenylamino)methyl)phosphine oxide (26c):** white solid was obtained with 70% isolated yield (63.5mg). m. p.: 130 - 132°C. <sup>1</sup>H NMR (500 MHz, CDCl<sub>3</sub>) δ 7.38 (d, *J* = 11.9 Hz, 4H), 7.16 (t, *J* = 7.9 Hz, 4H), 6.74 (t, *J* = 7.3 Hz, 1H), 6.66 (d, *J* = 7.7 Hz, 2H), 4.28 (s, 1H), 3.89 (d, *J* = 8.7 Hz, 2H), 2.33 (s, 12H). <sup>13</sup>C NMR (126 MHz, CDCl<sub>3</sub>) δ 147.9 (d, *J* = 10.7 Hz), 138.5 (d, *J* = 12.3 Hz), 134.0 (d, *J* = 2.8 Hz), 130.9 (d, *J* = 99.2 Hz), 129.1, 128.6 (d, *J* = 9.5 Hz), 118.4, 113.4, 43.8 (d, *J* = 77.6 Hz), 21.3. HRMS (EI) calcd for C<sub>27</sub>H<sub>23</sub>NOP [M + H]<sup>+</sup>: 364.1825; found: 364.1824.

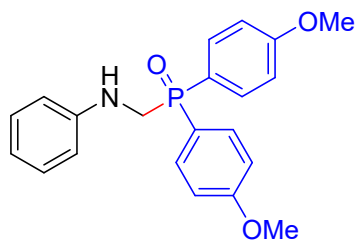

**bis(4-methoxyphenyl)((phenylamino)methyl)phosphine oxide (27c):** yellow solid was obtained with 65% isolated yield (59.6 mg). m. p.: 180-181 °C. <sup>1</sup>H NMR (500 MHz, CDCl<sub>3</sub>) δ 7.73 – 7.62 (m, 4H), 7.16 (dd, *J* = 8.4, 7.4 Hz, 2H), 6.98 (dd, *J* = 8.8, 2.2 Hz, 4H), 6.74 (t, *J* = 7.3 Hz, 1H), 6.65 (d, *J* = 7.7 Hz, 2H), 4.25 (s, 1H), 3.84 (d, *J* = 5.2 Hz, 2H), 3.84 (s, 6H). <sup>13</sup>C NMR (126 MHz, CDCl<sub>3</sub>) δ 162.7

(d,  $J = 2.8$  Hz), 147.7 (d,  $J = 11.1$  Hz), 133.0 (d,  $J = 10.9$  Hz), 129.2, 122.4 (d,  $J = 106.9$  Hz), 118.5, 114.3 (d,  $J = 12.9$  Hz), 113.3, 55.3, 44.2 (d,  $J = 79.6$  Hz).  $^{19}\text{F}$  NMR (471 MHz, DMSO)  $\delta$  -111.2. HRMS (EI) calcd for  $\text{C}_{21}\text{H}_{23}\text{NO}_3\text{P}$   $[\text{M} + \text{H}]^+$ : 368.1410; found: 368.1408.

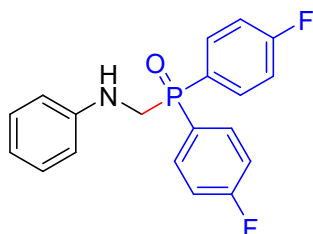

**bis(4-fluorophenyl)((phenylamino)methyl)phosphine oxide (28c)**: yellow solid was obtained with 93% isolated yield (79.7 mg). m. p.: 145-146 °C.  $^1\text{H}$  NMR (500 MHz,  $\text{CDCl}_3$ )  $\delta$  8.01 (s, 1H), 7.82 – 7.72 (m, 4H), 7.23 – 7.10 (m, 6H), 6.75 (t,  $J = 7.3$  Hz, 1H), 6.67 (d,  $J = 8.5$  Hz, 2H), 3.95 (d,  $J = 8.3$  Hz, 2H).  $^{13}\text{C}$  NMR (126 MHz,  $\text{CDCl}_3$ )  $\delta$  165.4 (dd,  $J = 254.8, 3.3$  Hz), 147.4 (d,  $J = 10.8$  Hz), 133.7 (dd,  $J = 11.1, 8.9$  Hz), 129.2, 126.2 (dd,  $J = 103.9, 3.5$  Hz), 118.7, 116.4 (dd,  $J = 21.5, 13.1$  Hz), 113.4, 44.1 (d,  $J = 80.5$  Hz).  $^{19}\text{F}$  NMR (471 MHz,  $\text{CDCl}_3$ )  $\delta$  -105.1. HRMS (EI) calcd for  $\text{C}_{19}\text{H}_{17}\text{F}_2\text{NOP}$   $[\text{M} + \text{H}]^+$ : 344.1010; found: 344.1008.

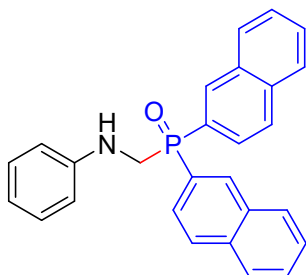

**di(naphthalen-2-yl)((phenylamino)methyl)phosphine oxide (29c)**: yellow solid was obtained with 66% isolated yield (67.2 mg). m. p.: 191-193 °C.  $^1\text{H}$  NMR (500 MHz,  $\text{CDCl}_3$ )  $\delta$  8.45 (d,  $J = 13.7$  Hz, 2H), 8.00 (s, 1H), 7.94 – 7.86 (m, 6H), 7.76 (t,  $J = 9.1$  Hz, 2H), 7.62 – 7.53 (m, 4H), 7.15 (d,  $J = 8.5$  Hz, 2H), 6.72 (d,  $J = 8.0$  Hz, 3H), 4.15 (d,  $J = 8.5$  Hz, 2H).  $^{13}\text{C}$  NMR (126 MHz,  $\text{CDCl}_3$ )  $\delta$  147.7 (d,  $J = 10.9$  Hz), 134.9 (d,  $J = 2.2$  Hz), 133.5 (d,  $J = 8.9$  Hz), 132.5 (d,  $J = 13.0$  Hz), 129.1 (d,  $J = 29.3$  Hz), 128.8 (d,  $J = 11.8$  Hz), 128.5, 127.6 (d,  $J = 101.0$  Hz), 127.5 (d,  $J = 89.9$  Hz), 125.6 (d,  $J = 10.6$  Hz), 118.5, 113.5, 43.9 (d,  $J = 79.2$  Hz). HRMS (EI) calcd for  $\text{C}_{27}\text{H}_{23}\text{NOP}$   $[\text{M} + \text{H}]^+$ : 408.1512; found: 408.1511.

# Copies of product NMR Spectra

**1c**

## <sup>1</sup>H NMR

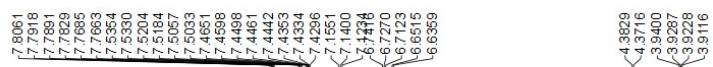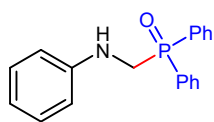

**1c**

CDCl<sub>3</sub>, 500 MHz

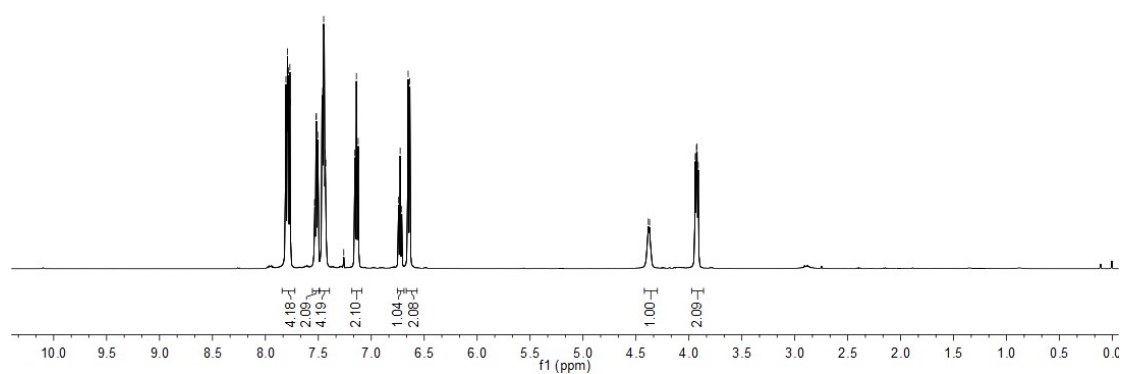

## <sup>13</sup>C NMR

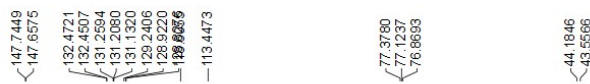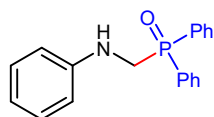

**1c**

CDCl<sub>3</sub>, 126 MHz

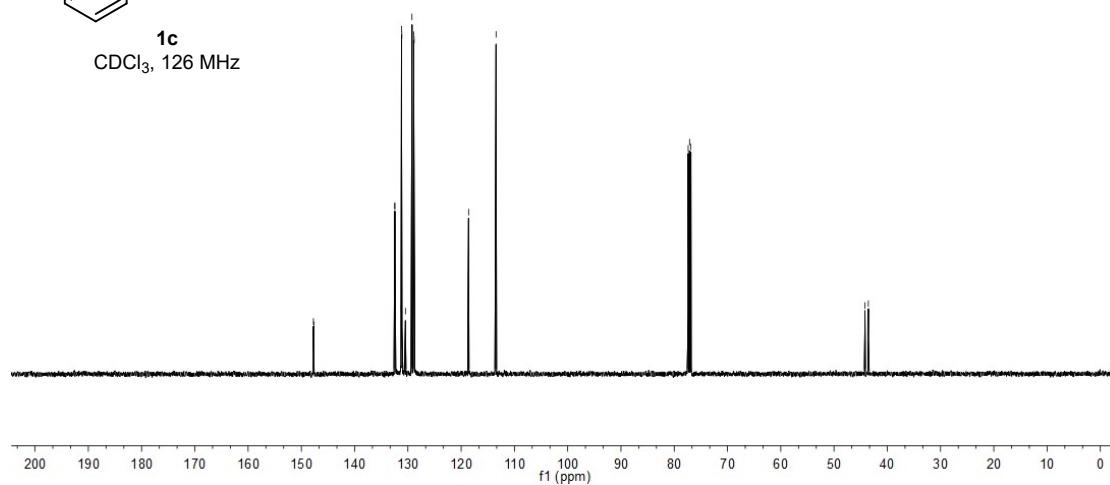

2c

<sup>1</sup>H NMR

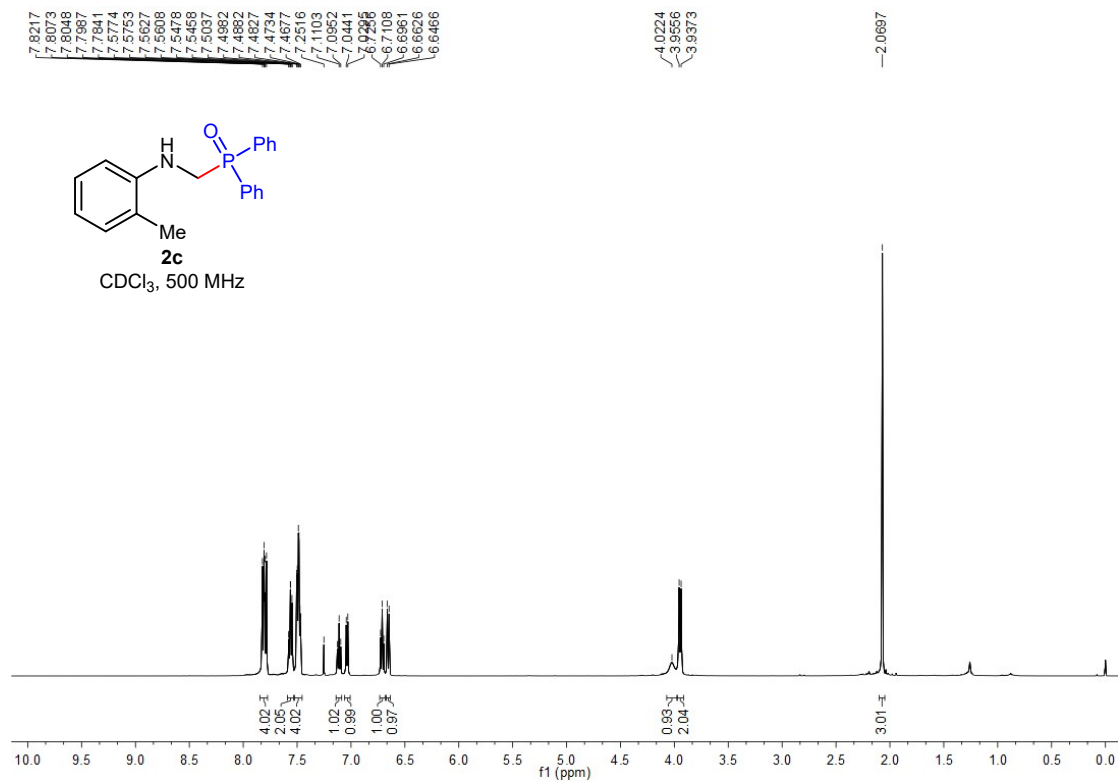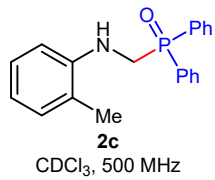

<sup>13</sup>C NMR

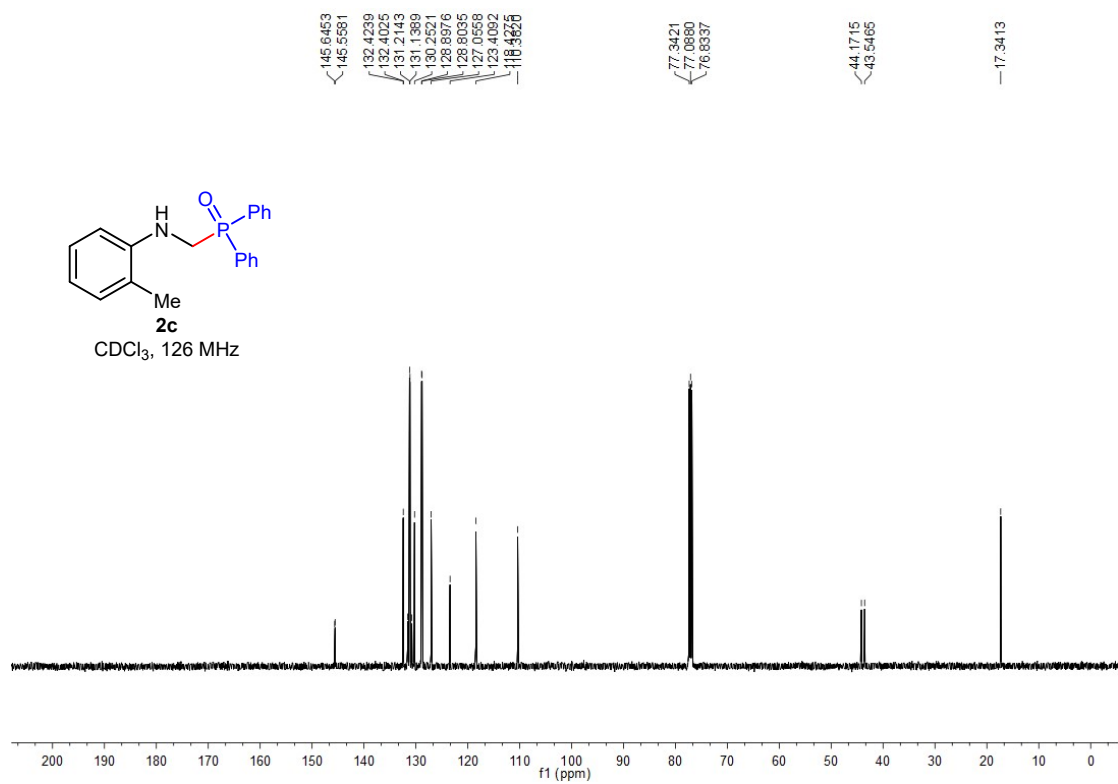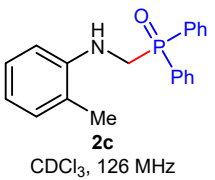

### 3c

### <sup>1</sup>H NMR

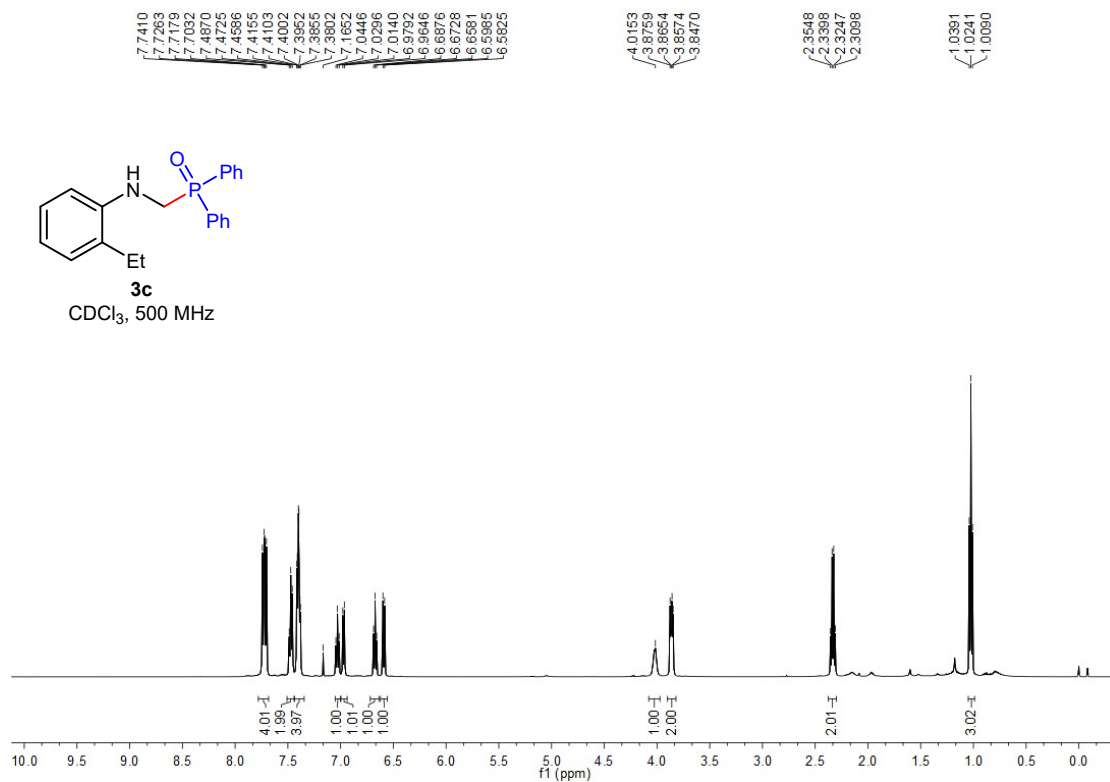

### <sup>13</sup>C NMR

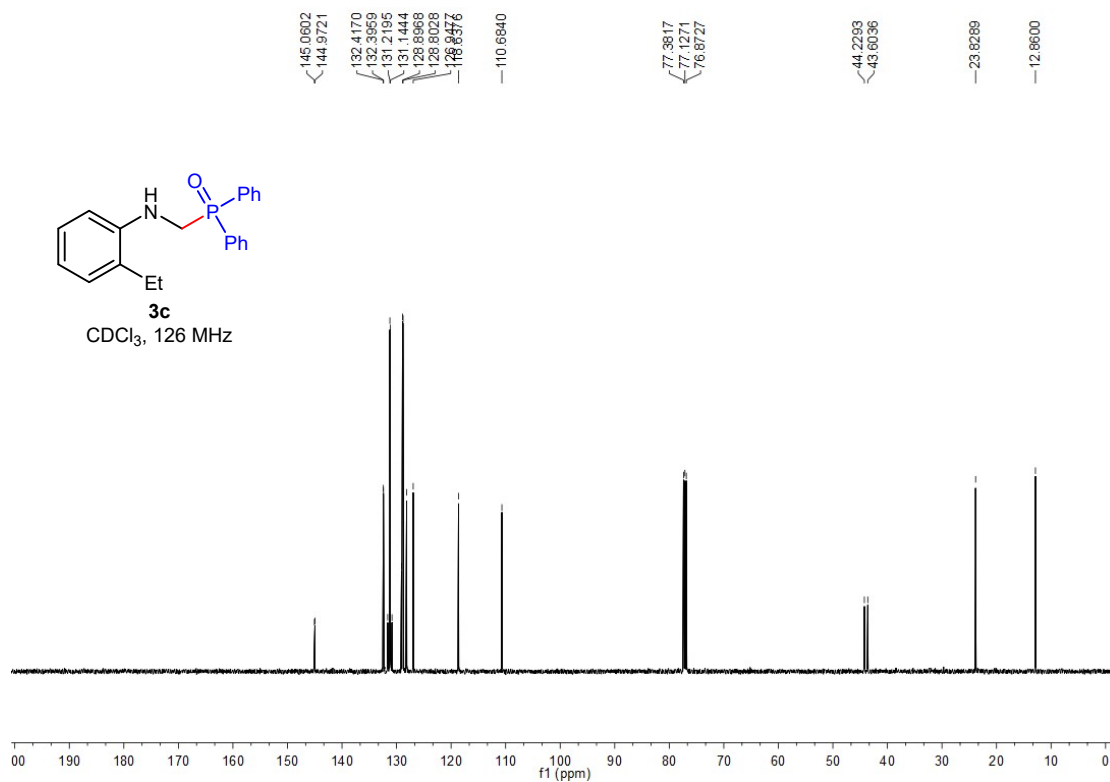



## 4c

<sup>1</sup>H NMR

7.8308  
7.8164  
7.8142  
7.8077  
7.7993  
7.6834  
7.5685  
7.5557  
7.5538  
7.5119  
7.5063  
7.4966  
7.4910  
7.4811  
7.4763  
7.2625  
7.2227  
7.2089  
7.2070  
7.1175  
7.1028  
7.0883  
7.0865  
6.7064  
6.6801  
6.6805  
6.6790  
6.6643  
6.6500  
6.6483

4.7064  
4.6987  
3.9988  
3.9880  
3.9810  
3.9702

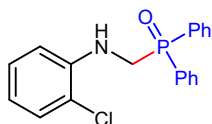

**4c**  
CDCl<sub>3</sub>, 500 MHz

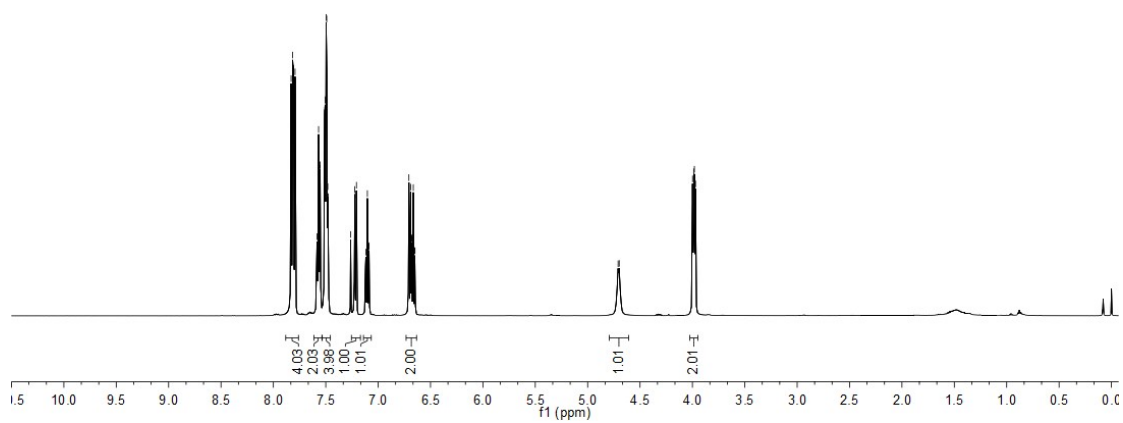<sup>13</sup>C NMR

143.4164  
143.3307  
132.5137  
132.4822  
131.1885  
129.2635  
128.9441  
128.8470  
126.1413  
118.0180  
111.8370

77.3259  
77.0756  
76.8274

44.2176  
43.5956

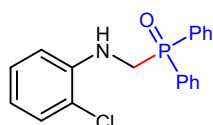

**4c**  
CDCl<sub>3</sub>, 126 MHz

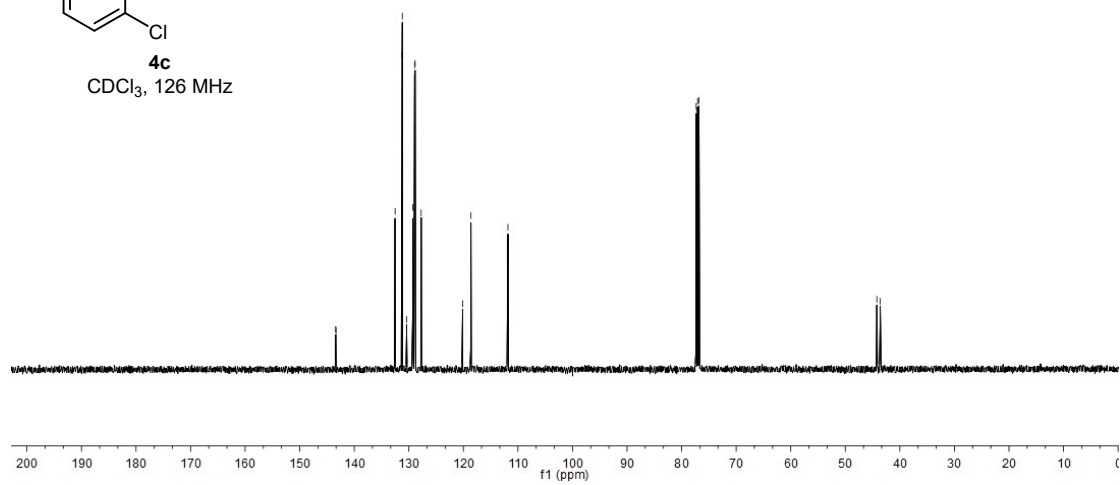

5c

<sup>1</sup>H NMR

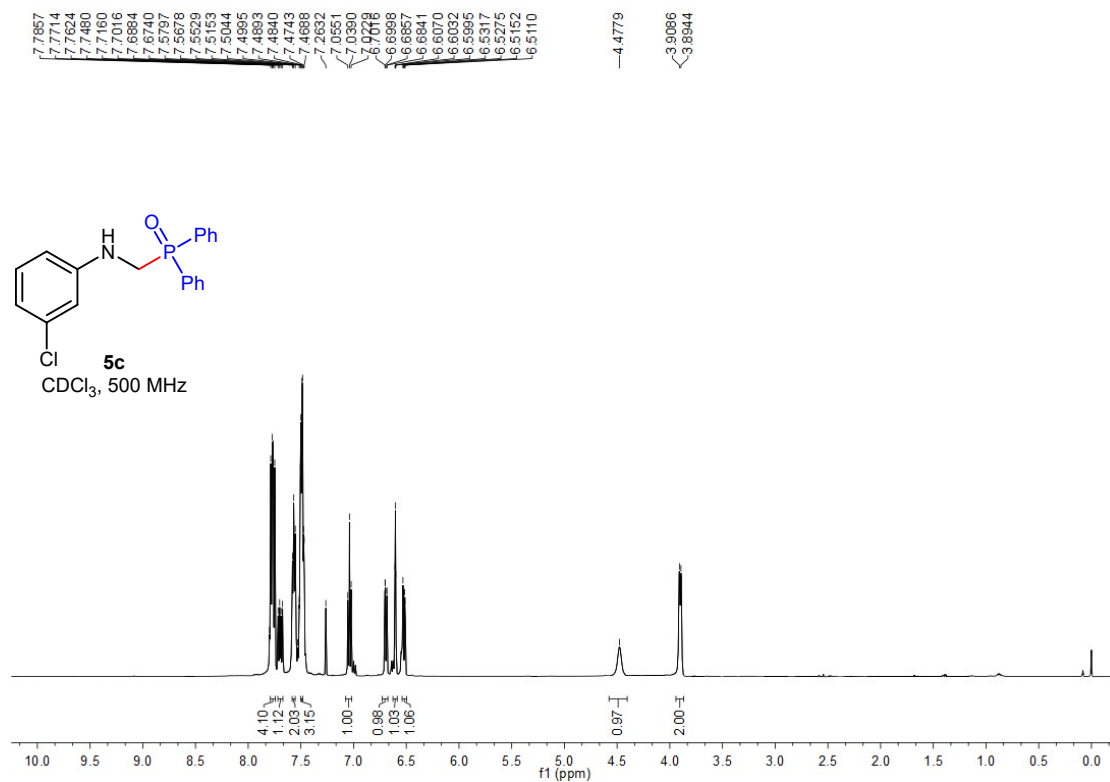

<sup>13</sup>C NMR

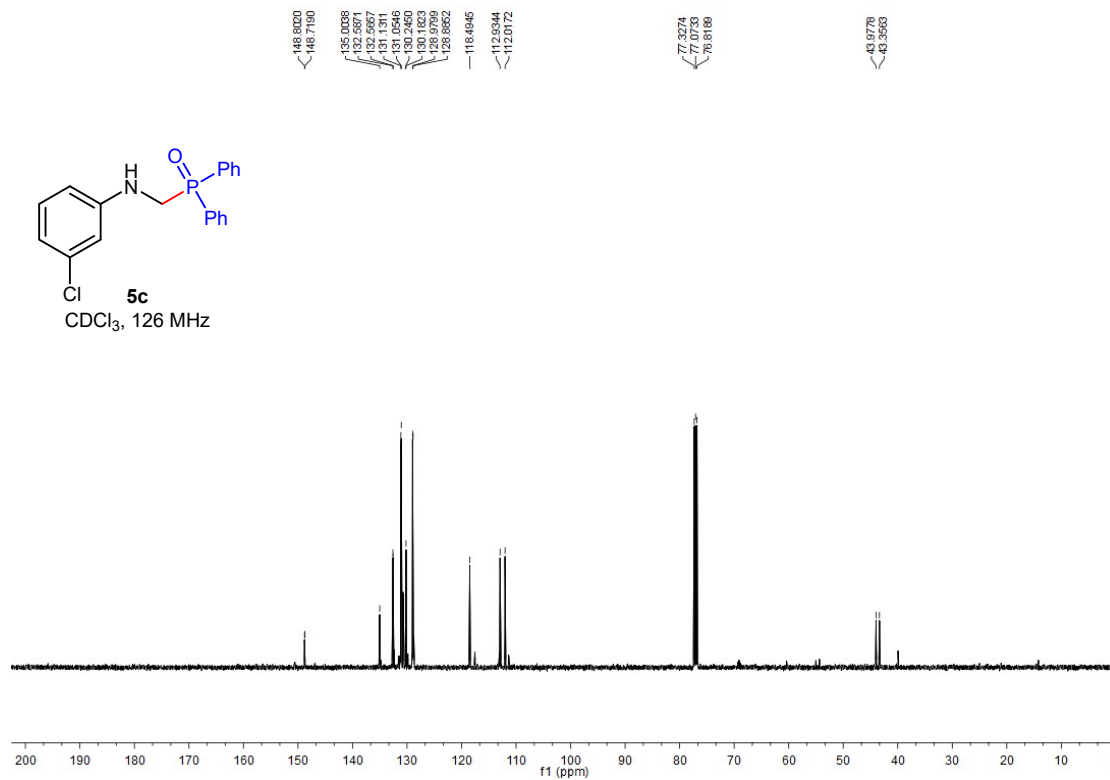

6c

<sup>1</sup>H NMR

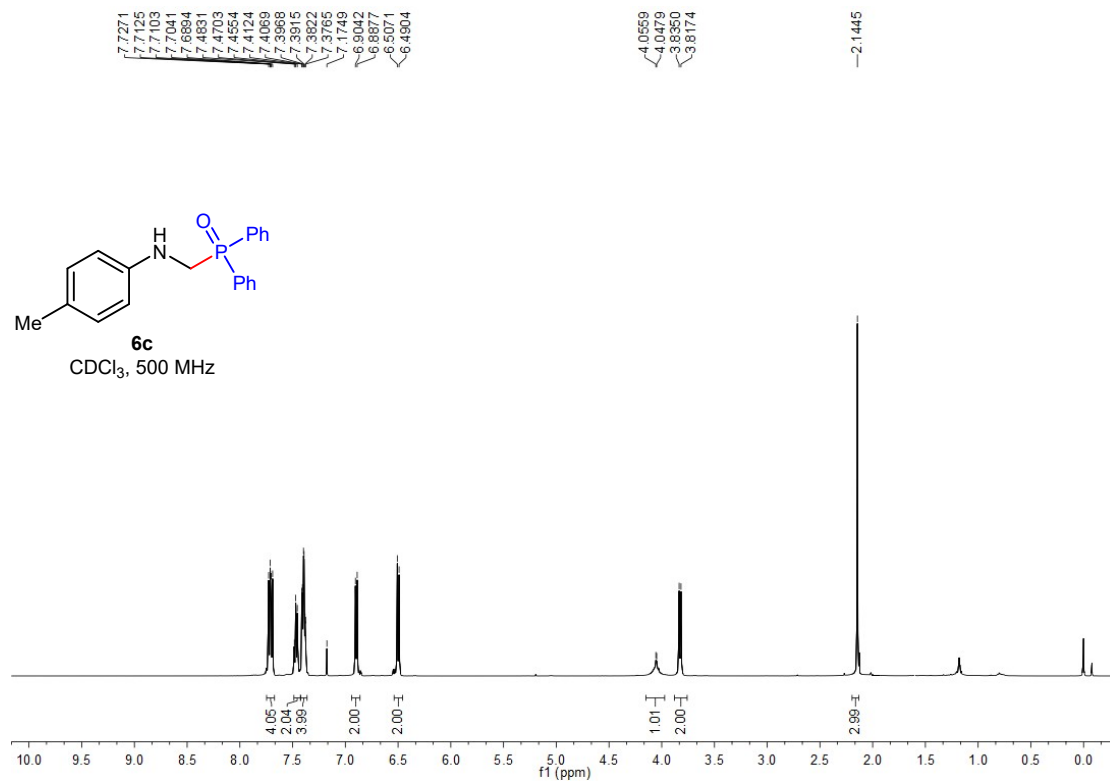

<sup>13</sup>C NMR

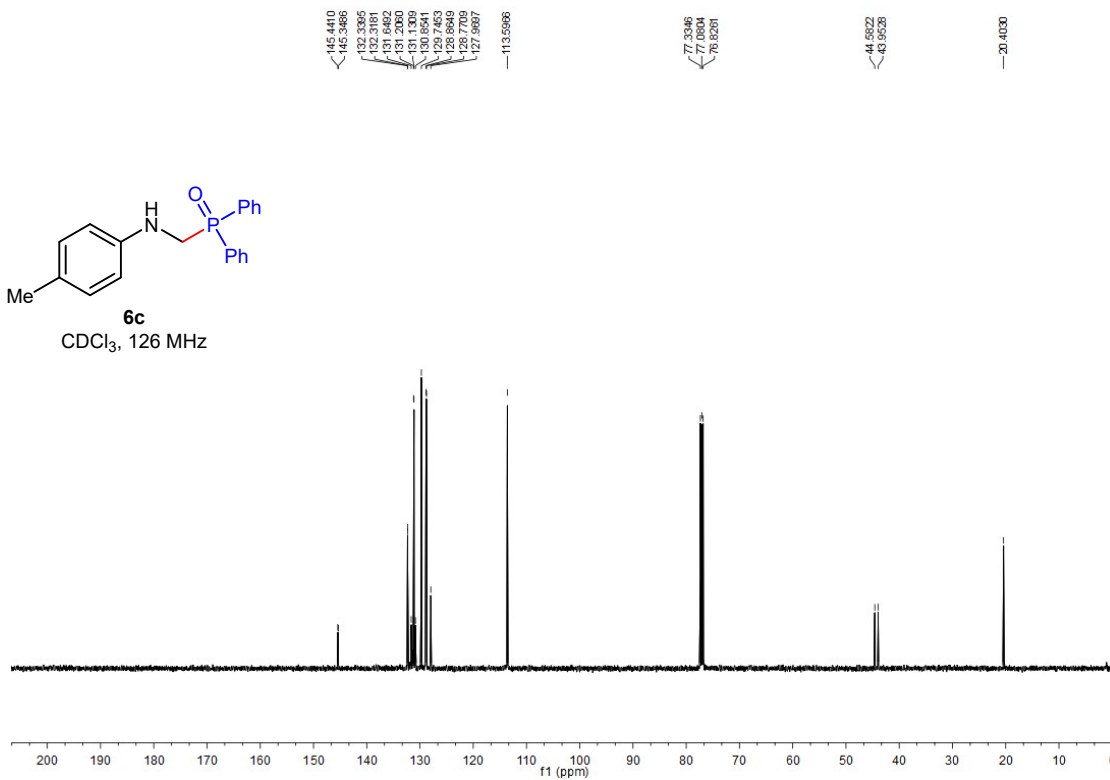

## 7c

<sup>1</sup>H NMR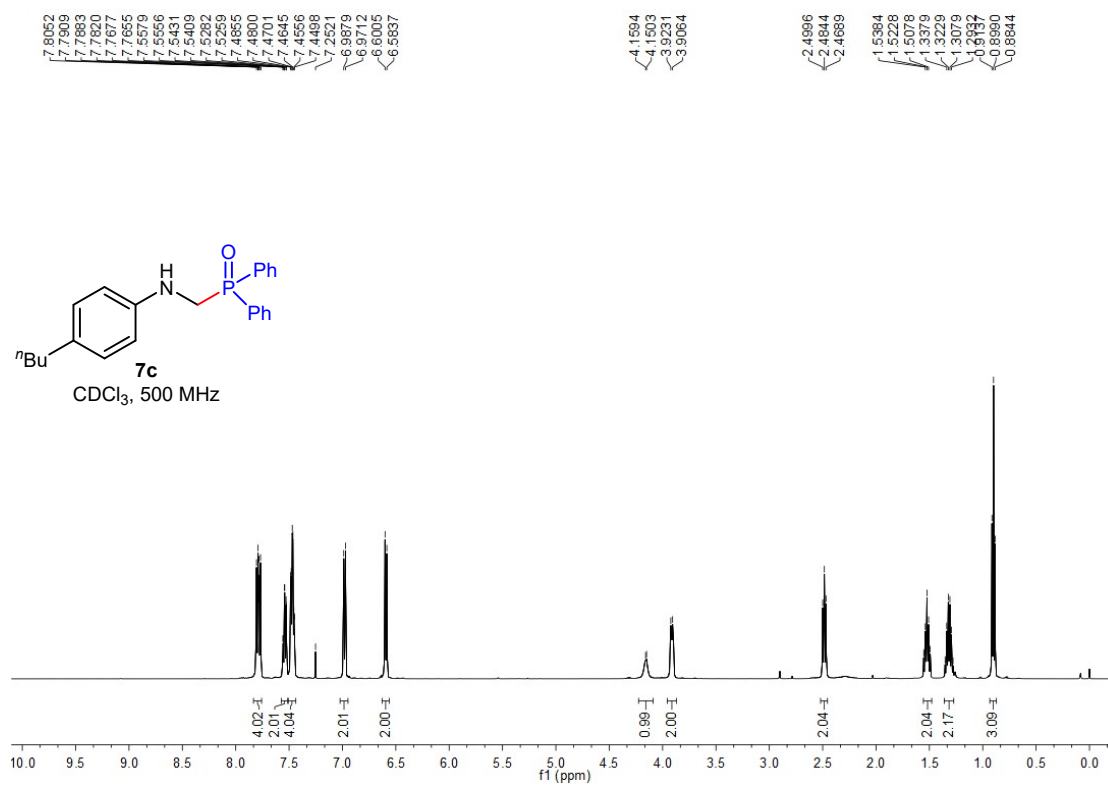<sup>13</sup>C NMR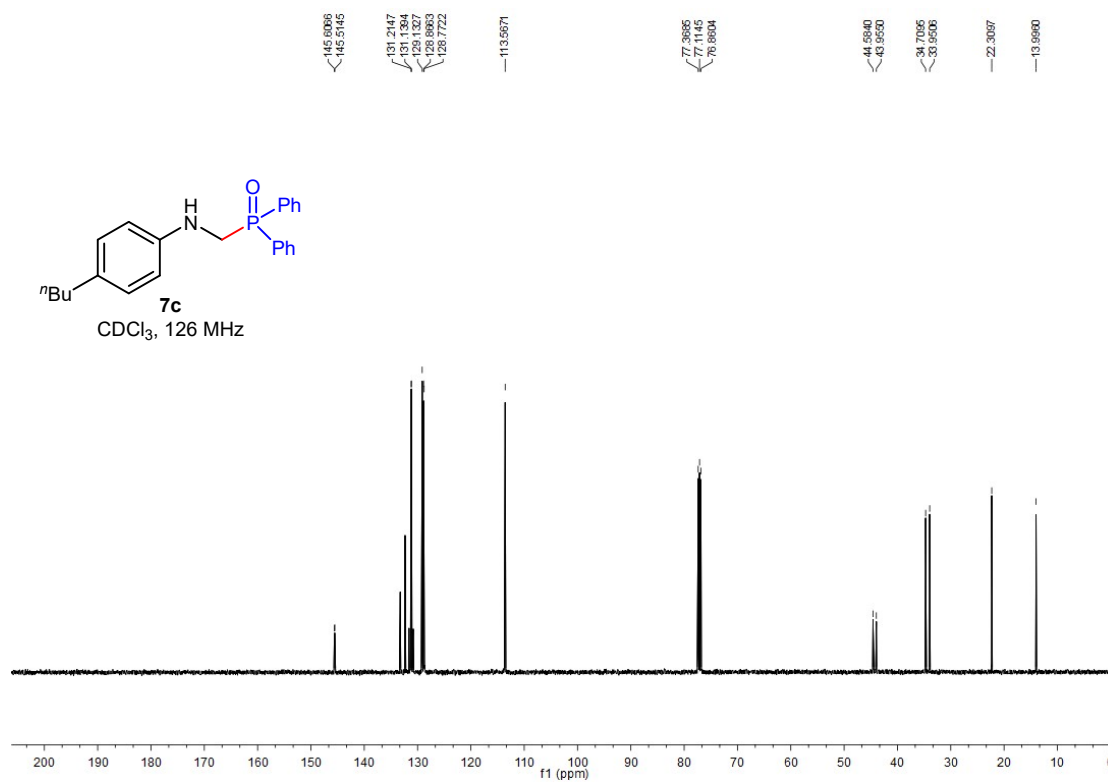

8c

<sup>1</sup>H NMR

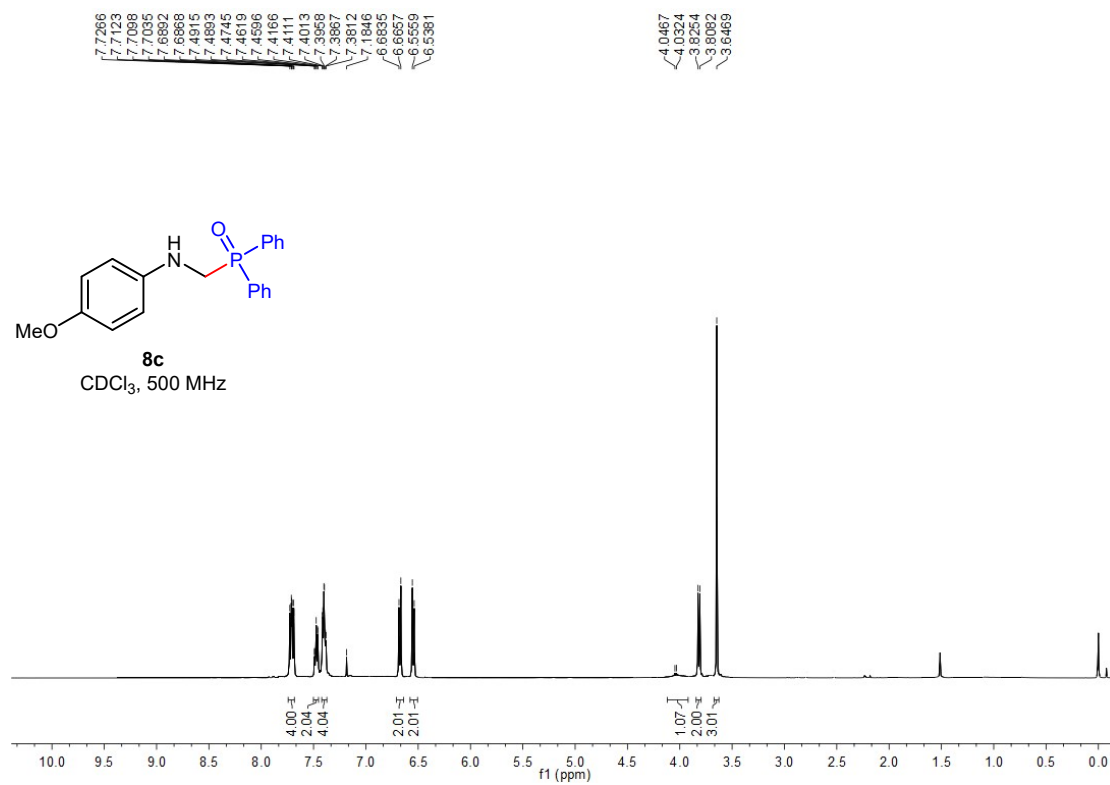

<sup>13</sup>C NMR

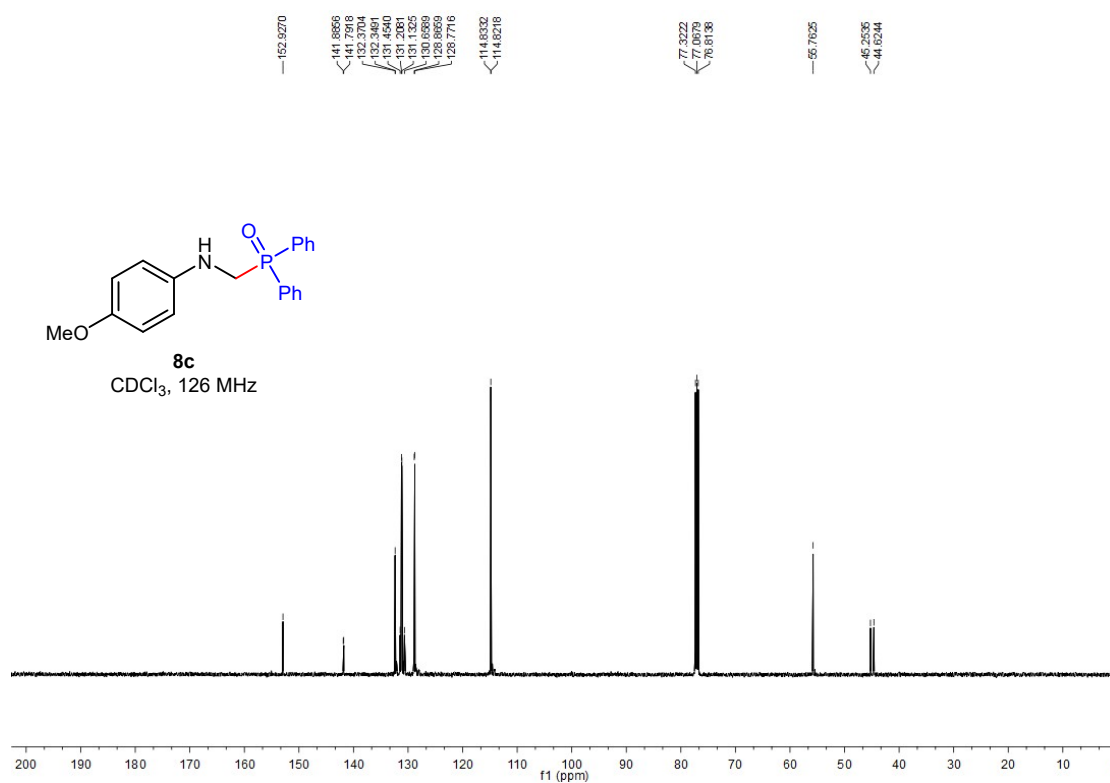

# 9c

## <sup>1</sup>H NMR

7.7366  
7.7225  
7.7198  
7.7134  
7.6982  
7.6966  
7.4908  
7.4784  
7.4639  
7.4637  
7.4372  
7.4352  
7.4205  
7.4187  
7.4079  
7.3933  
7.3874  
7.3458  
7.3286  
7.3119  
7.2969  
7.2810  
7.1724  
6.6539  
6.6367

4.3969  
3.8998  
3.8826

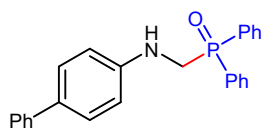

9c

CDCl<sub>3</sub>, 500 MHz

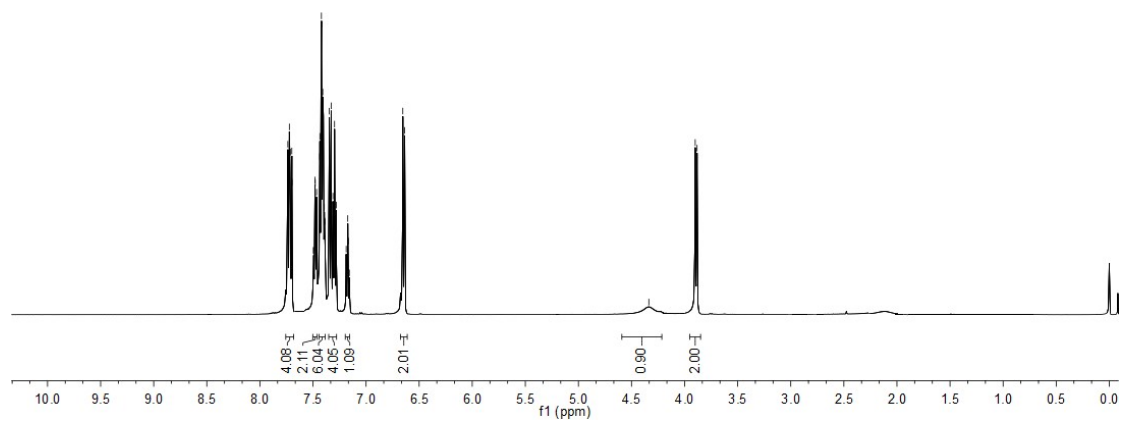

## <sup>13</sup>C NMR

147.0845  
147.0876  
140.9865  
132.4817  
132.4809  
131.2023  
131.1368  
128.9557  
128.8914  
128.8885  
127.9445  
126.4005  
126.2628

77.3547  
77.1005  
76.8463

44.2425  
43.6162

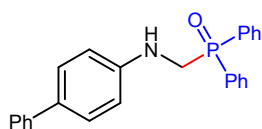

9c

CDCl<sub>3</sub>, 126 MHz

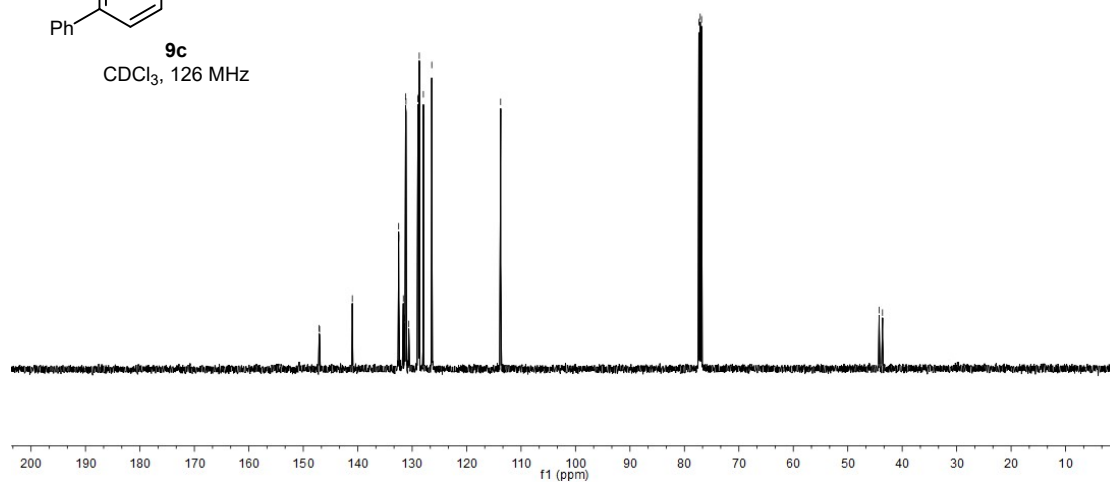

10c

<sup>1</sup>H NMR

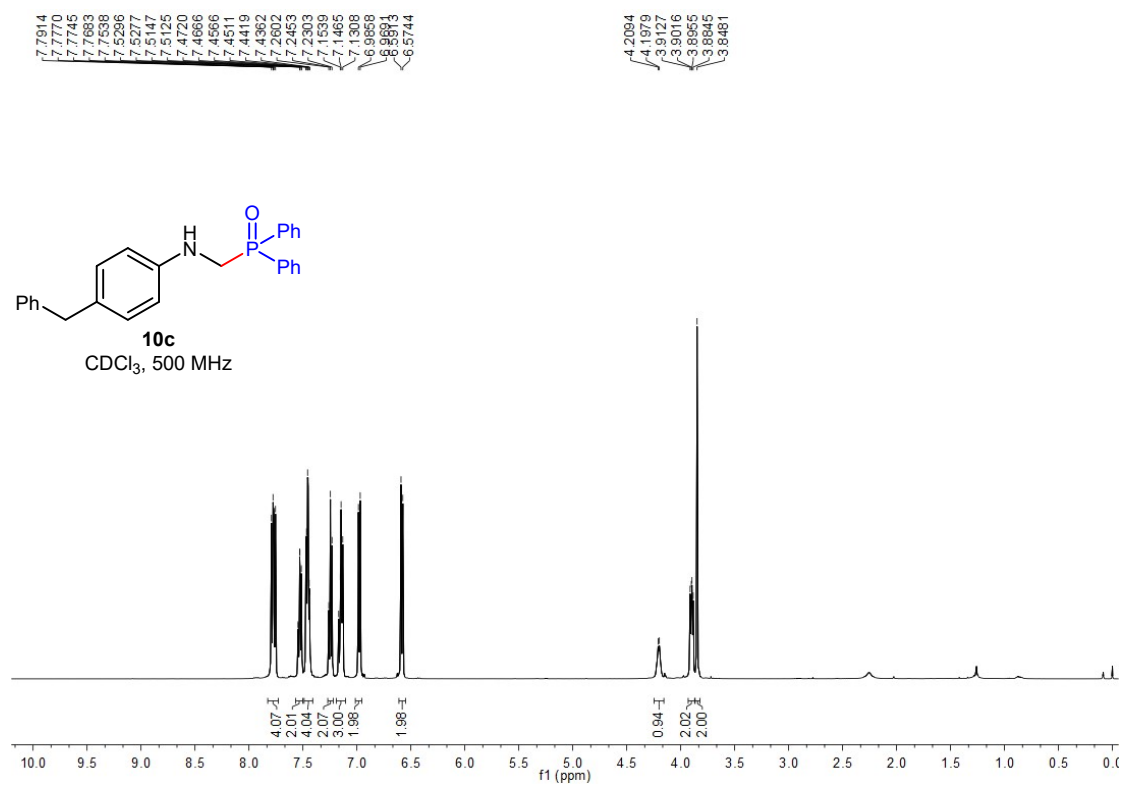

<sup>13</sup>C NMR

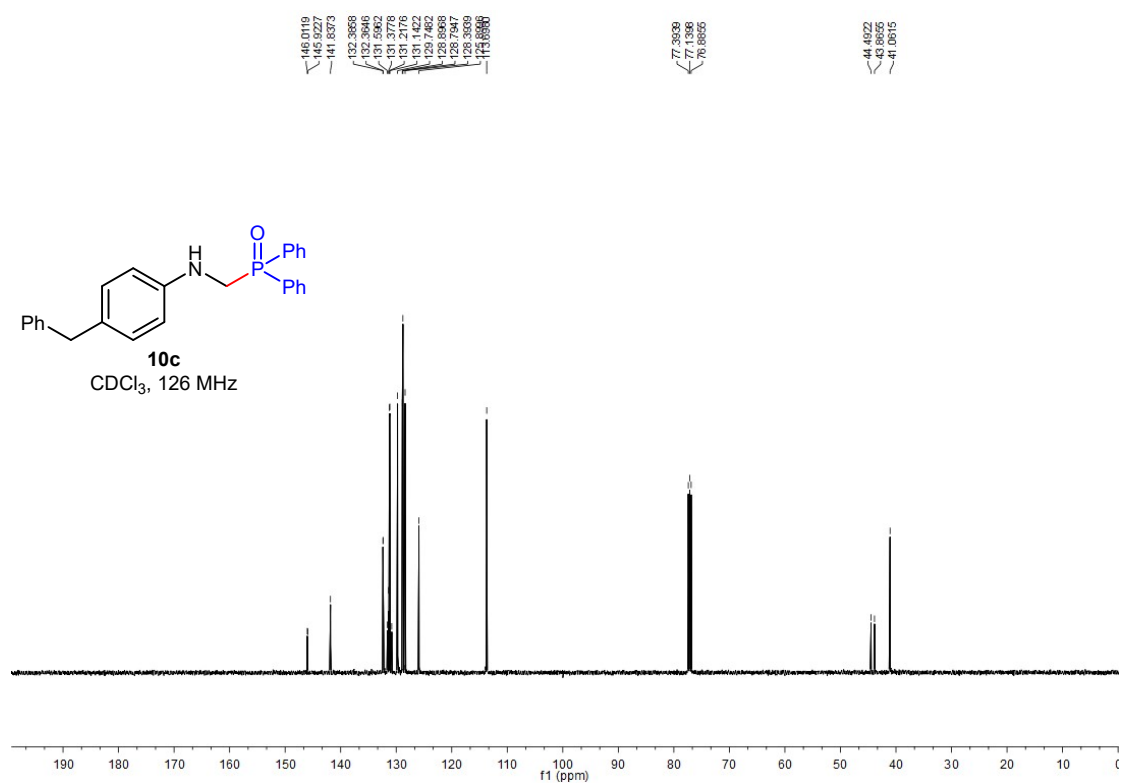

# 11c

## <sup>1</sup>H NMR

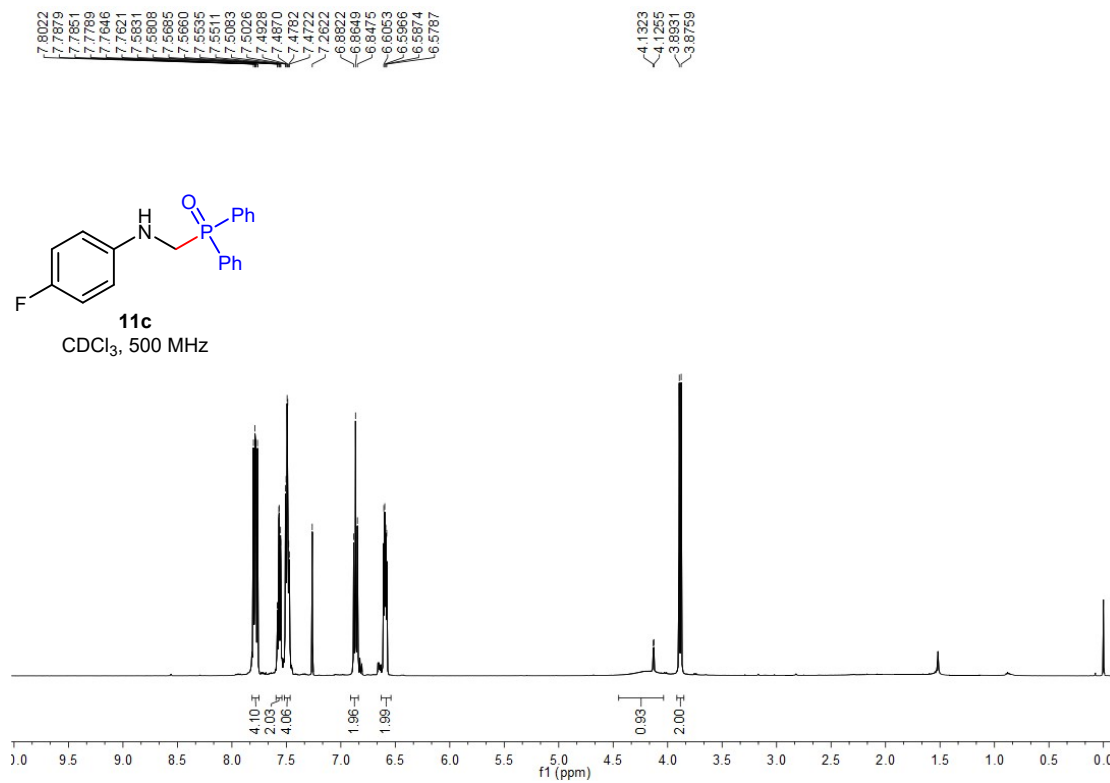

## <sup>13</sup>C NMR

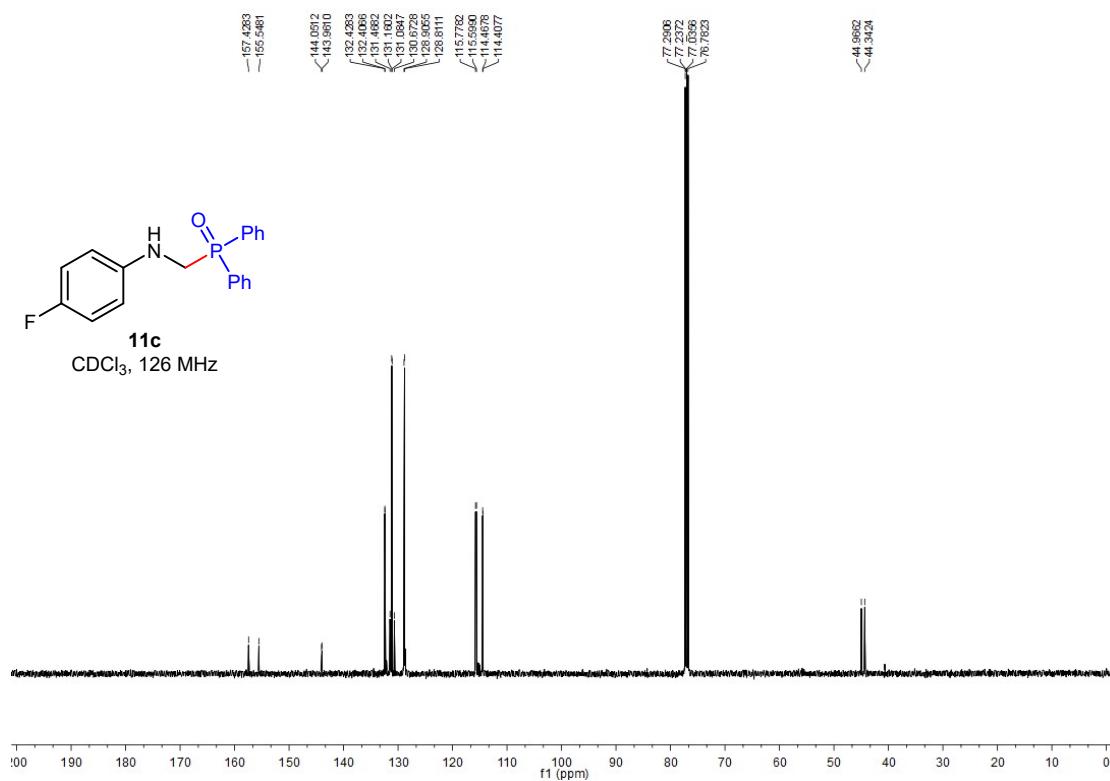



# <sup>19</sup>F NMR

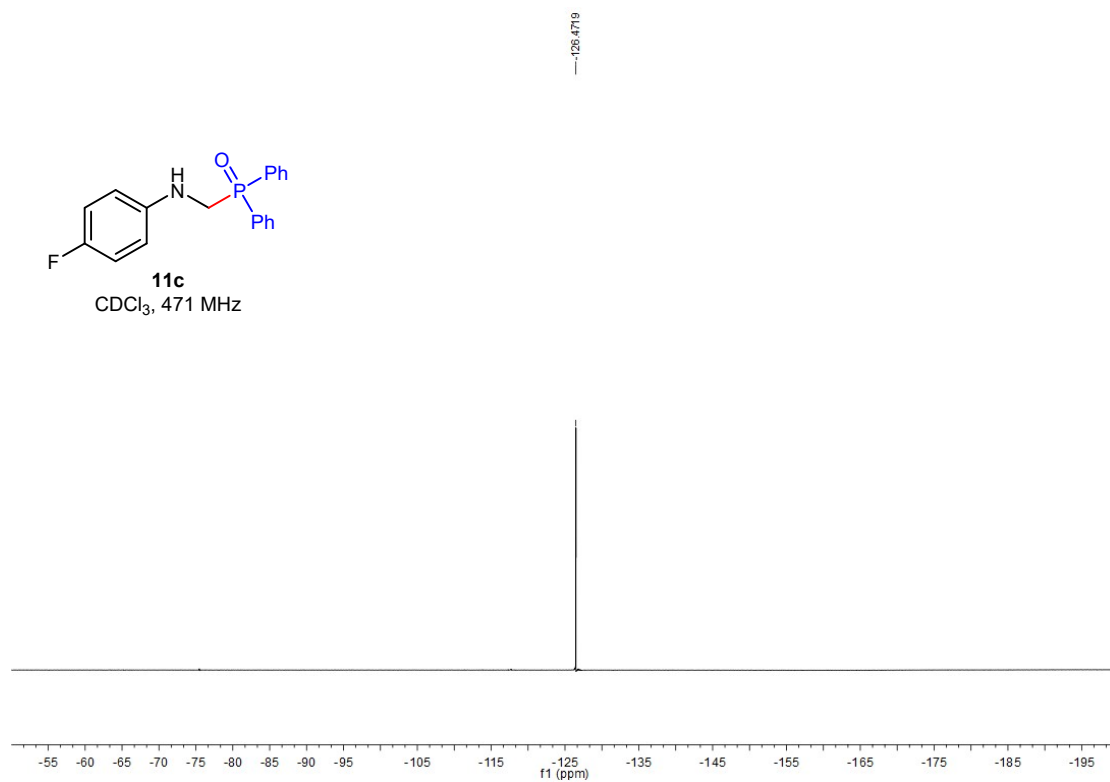

# **12c**

## <sup>1</sup>H NMR

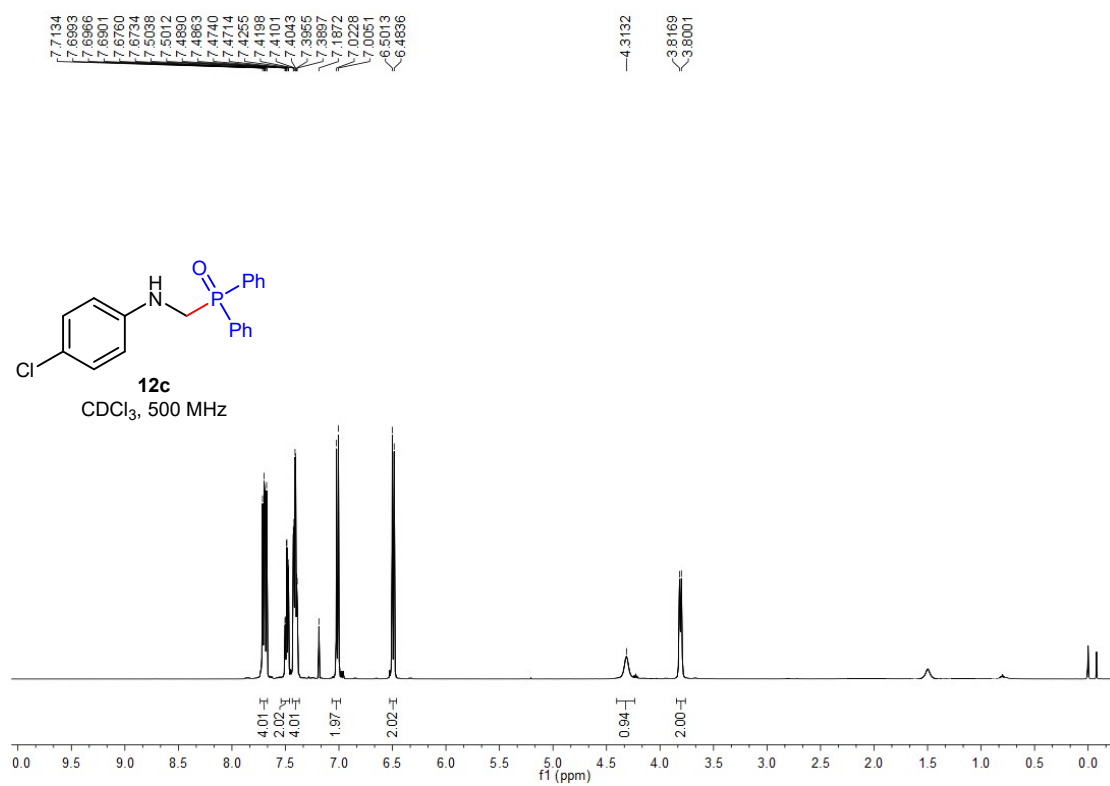

### <sup>13</sup>C NMR

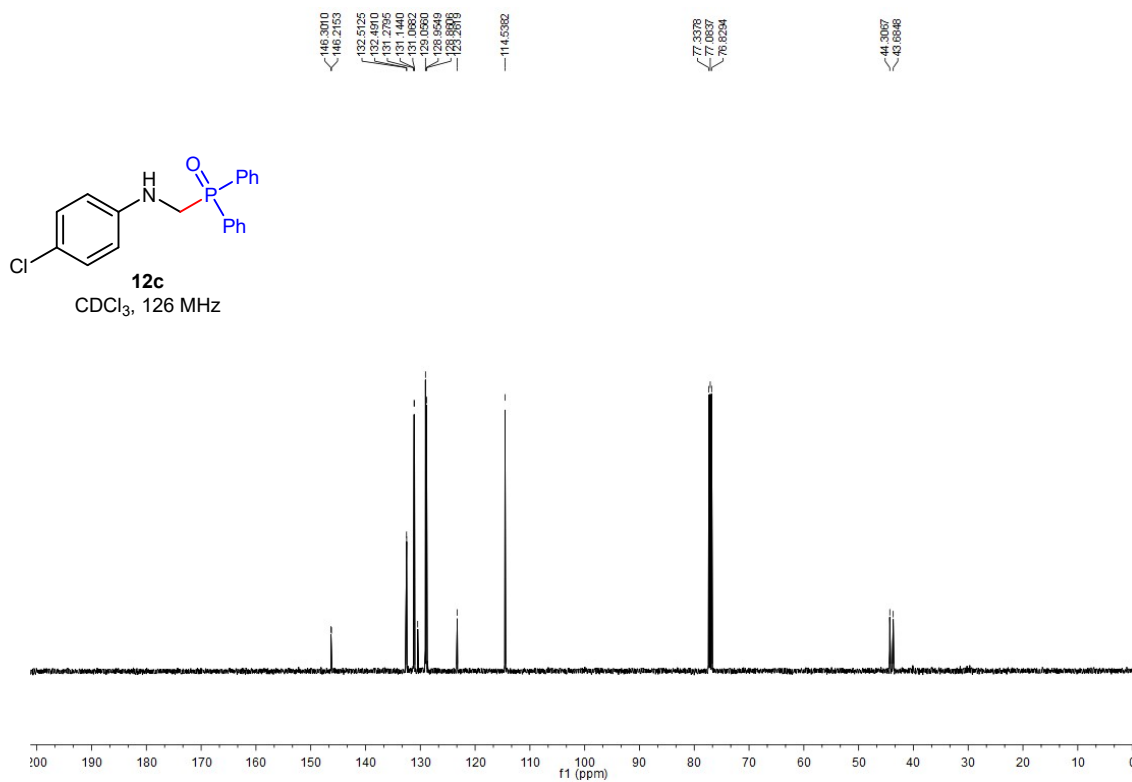

### **13c**

### <sup>1</sup>H NMR

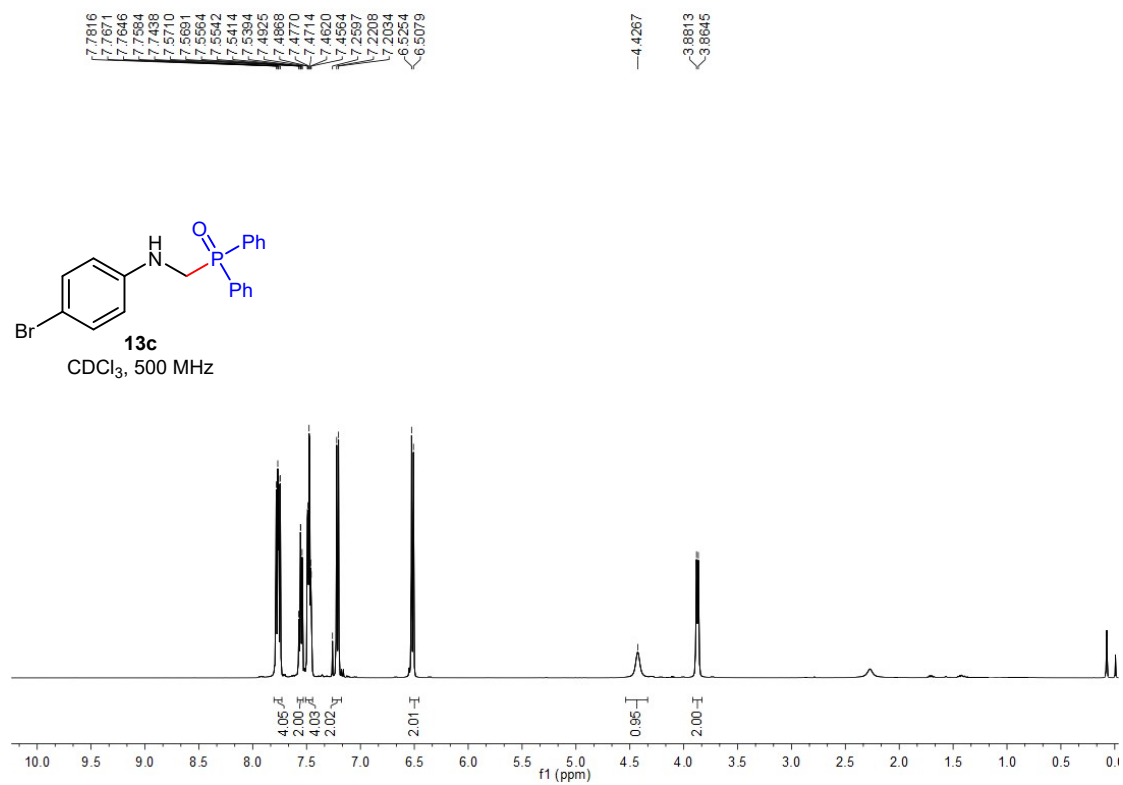

### <sup>13</sup>C NMR

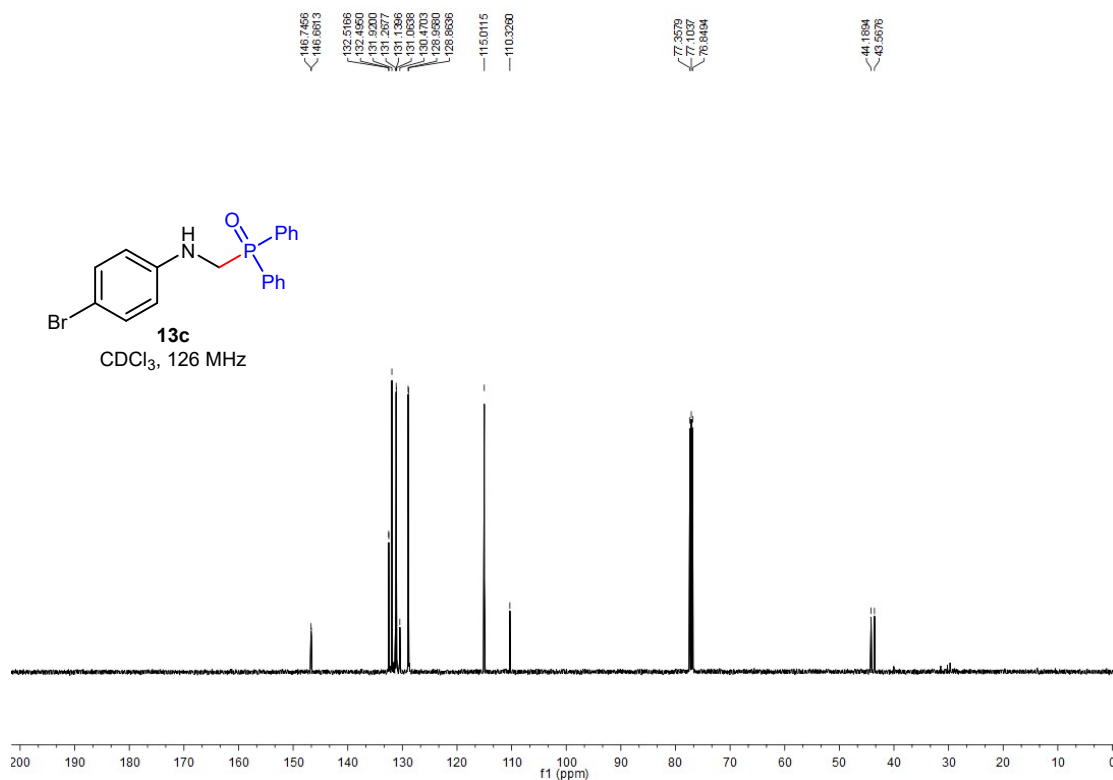

### **14c**

### <sup>1</sup>H NMR

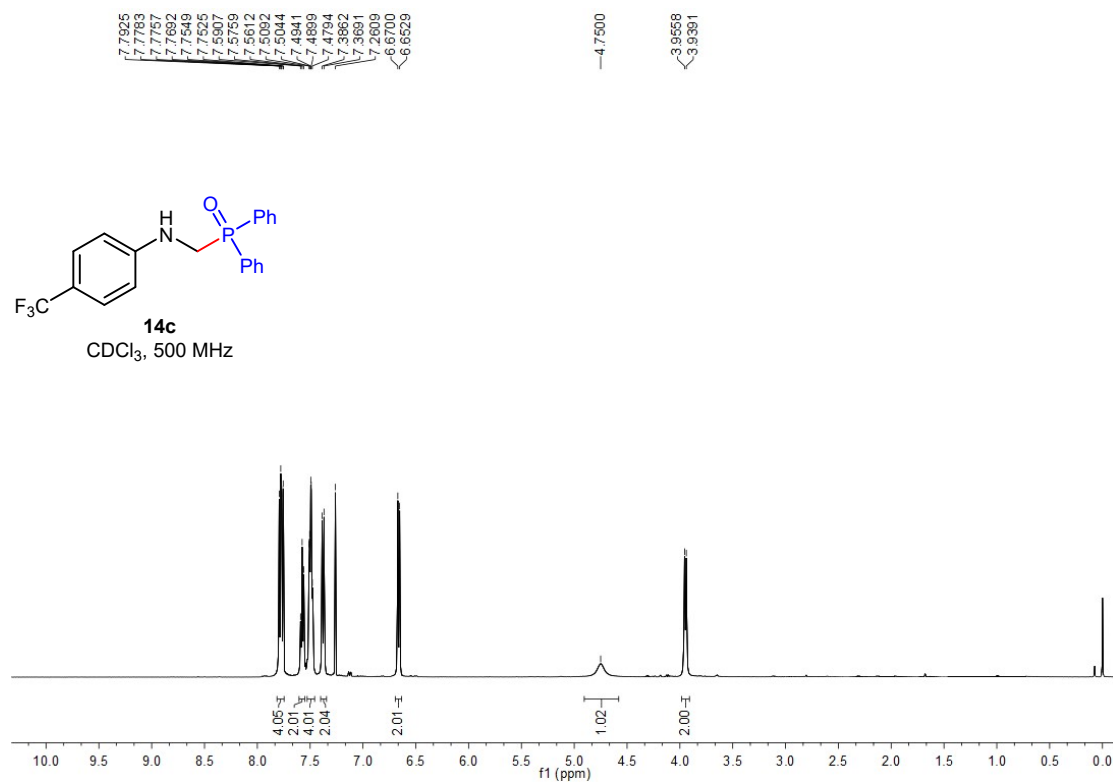

### <sup>13</sup>C NMR

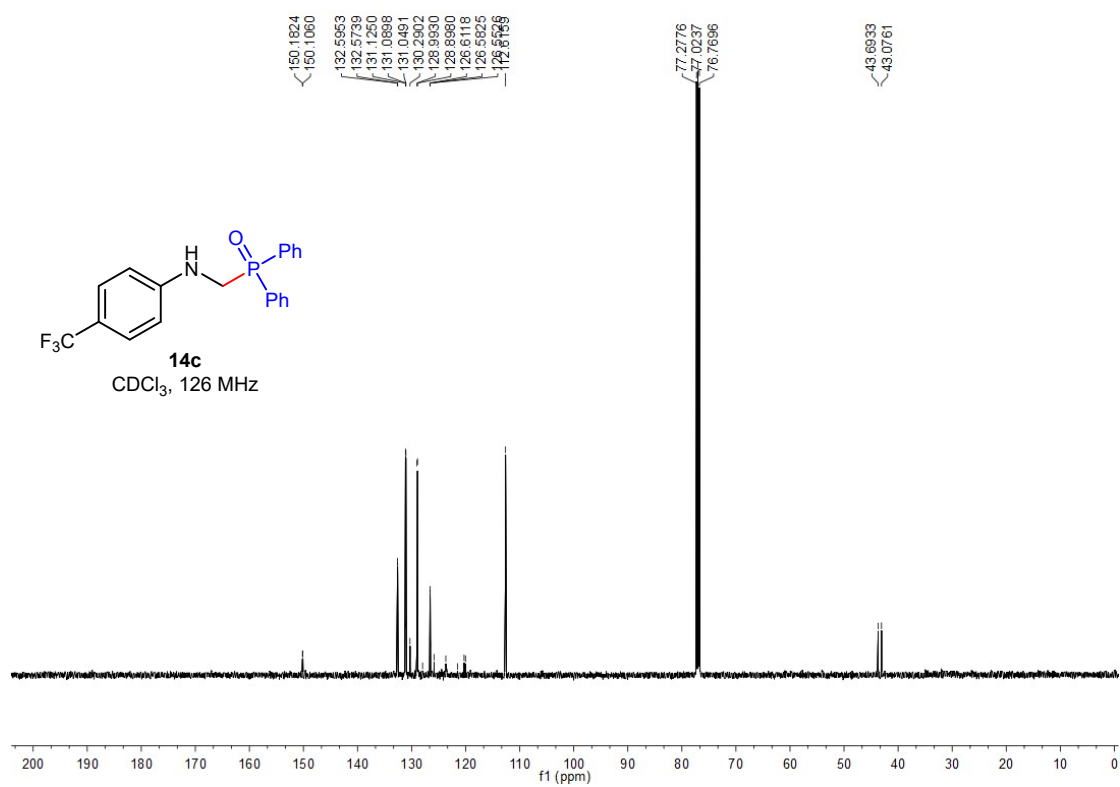

### <sup>19</sup>F NMR

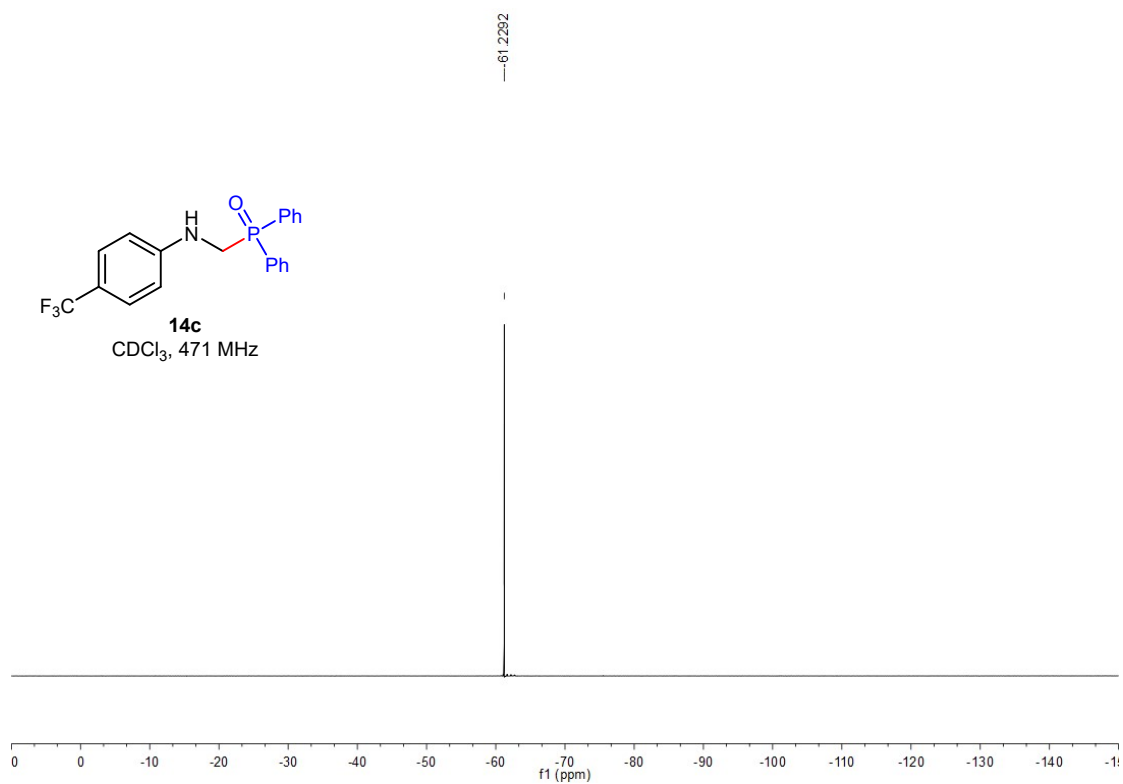

# 15c

## <sup>1</sup>H NMR

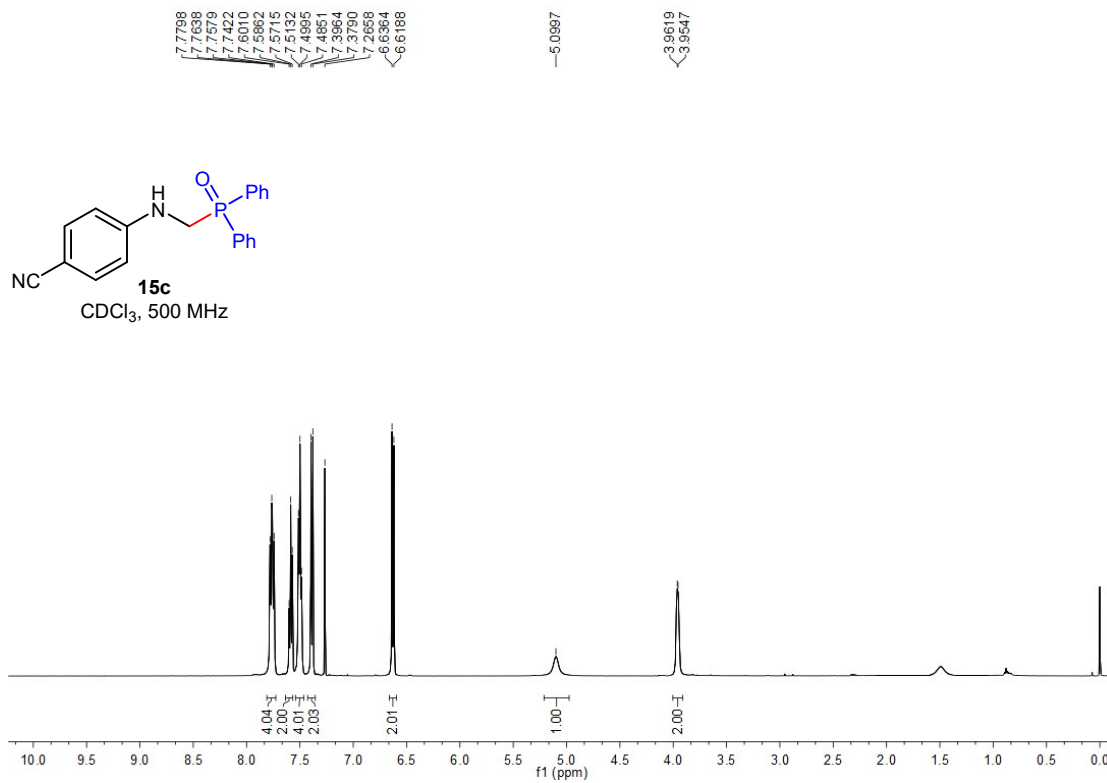

## <sup>13</sup>C NMR

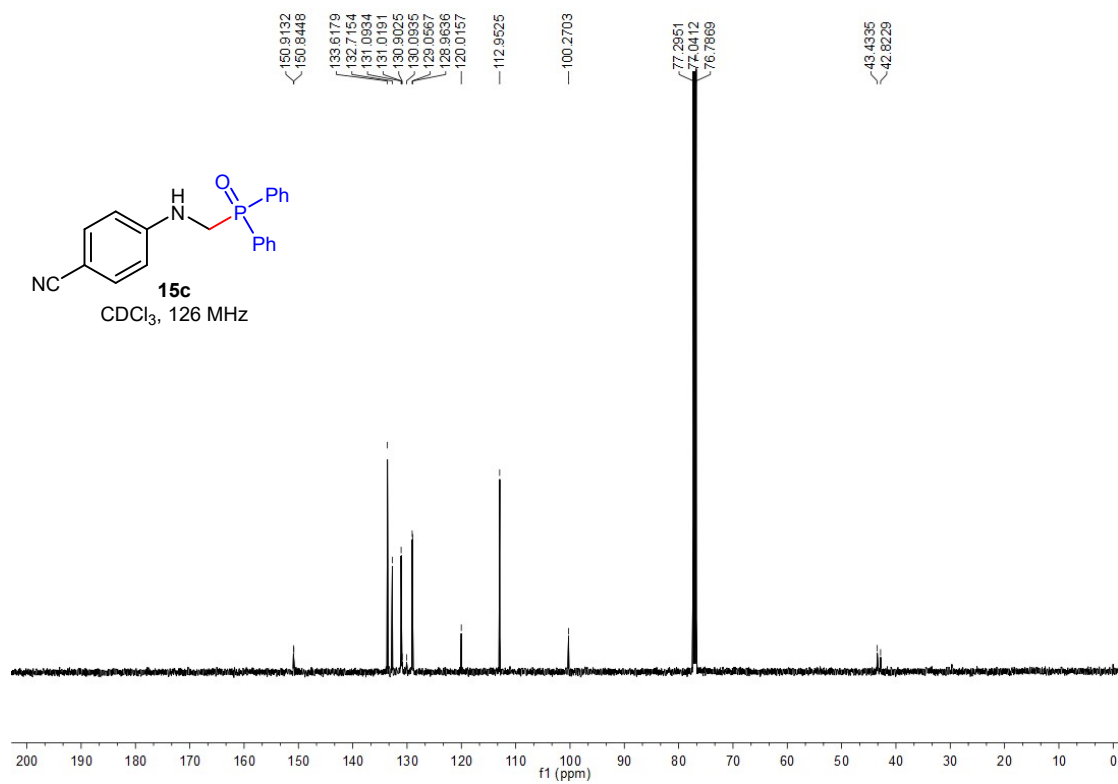

# 16c

## <sup>1</sup>H NMR

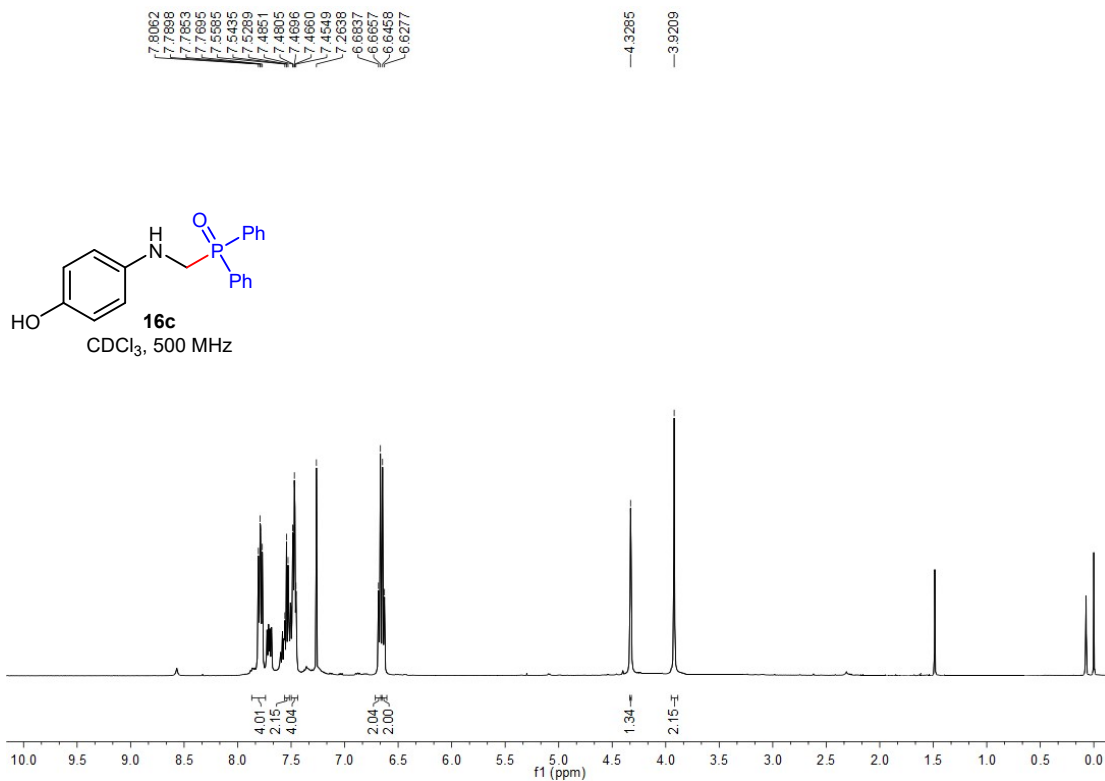

## <sup>13</sup>C NMR

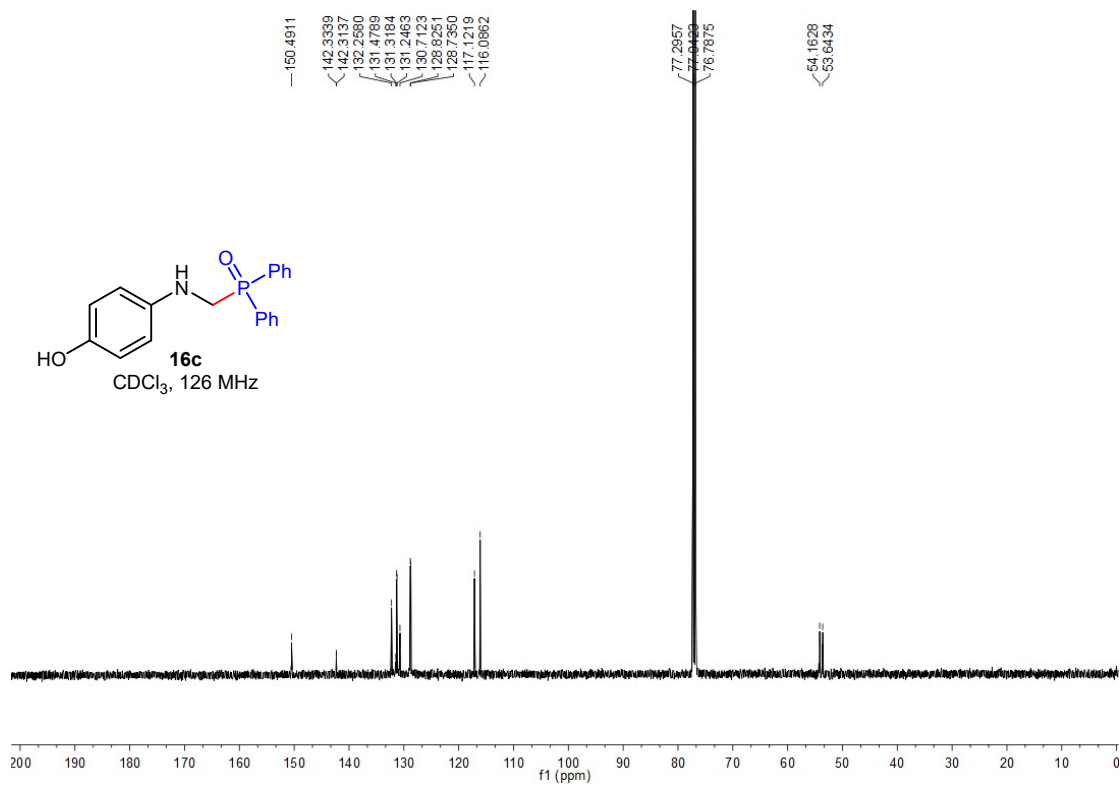

# 17c

## <sup>1</sup>H NMR

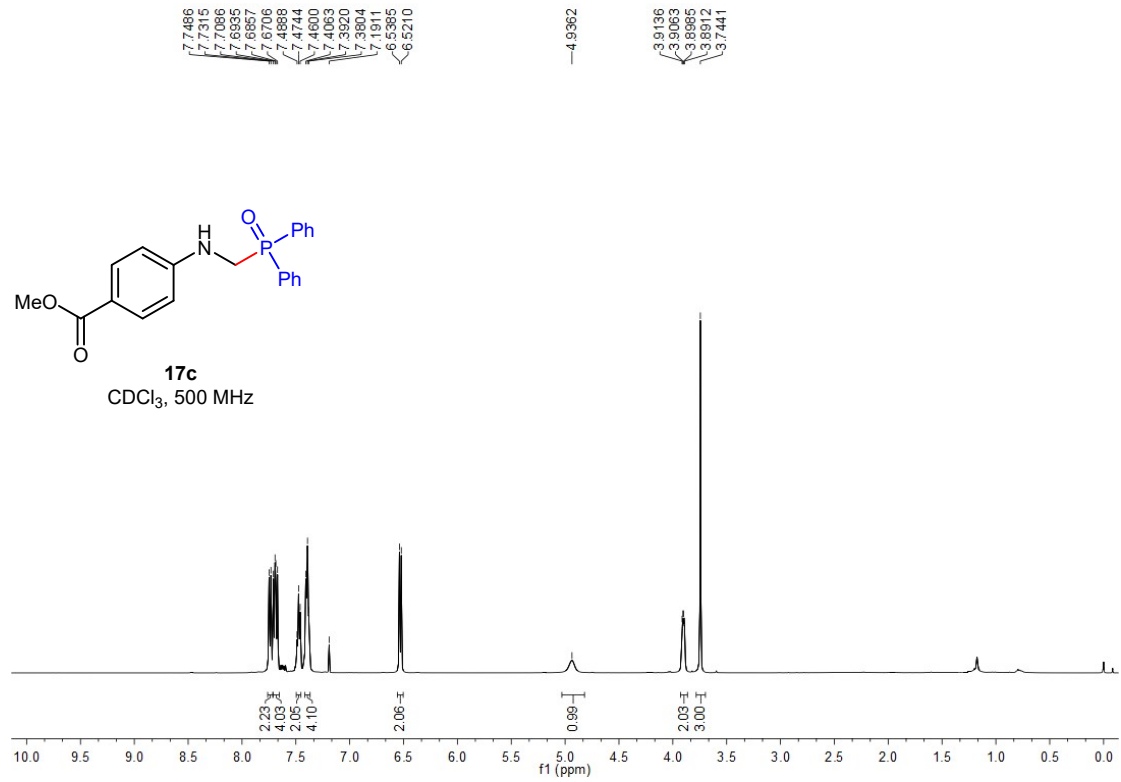

## <sup>13</sup>C NMR

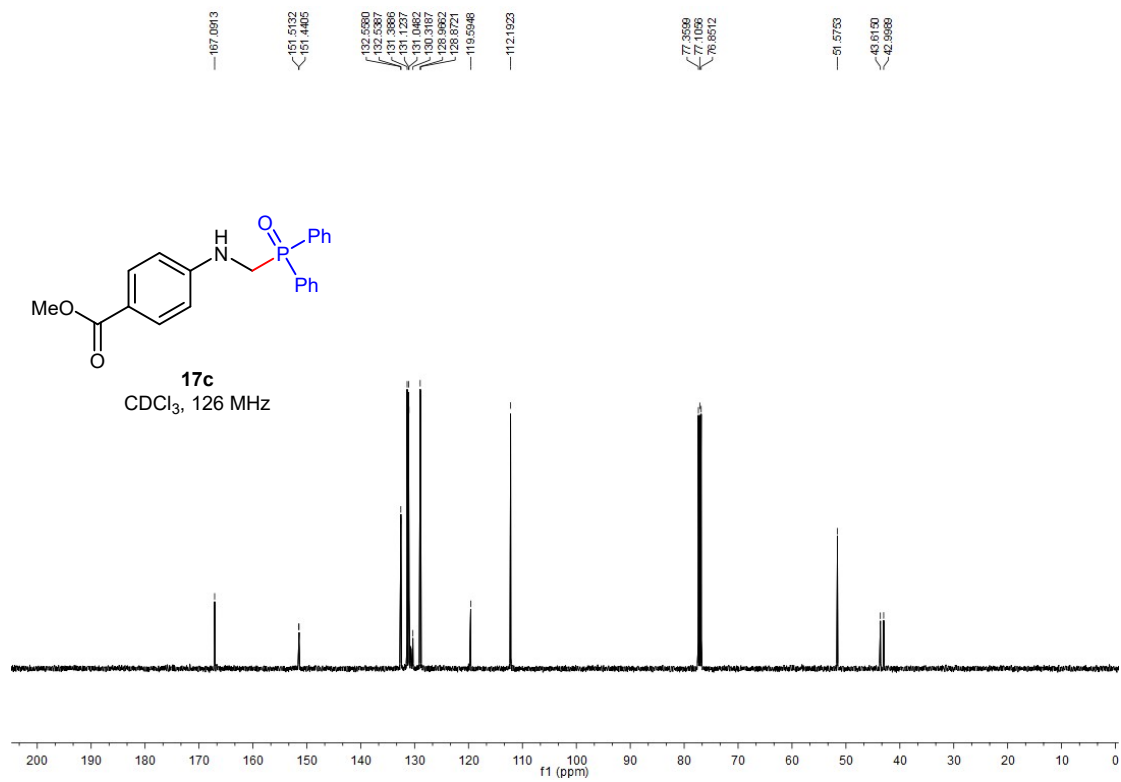

# 18c

## <sup>1</sup>H NMR

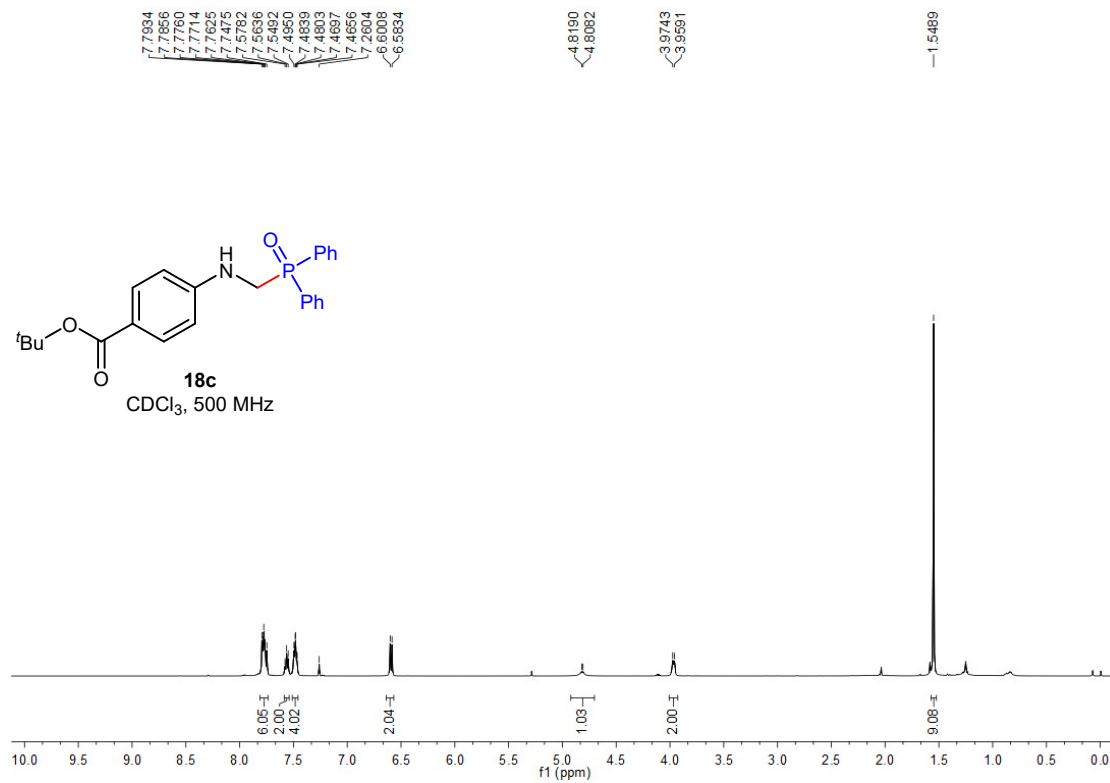

## <sup>13</sup>C NMR

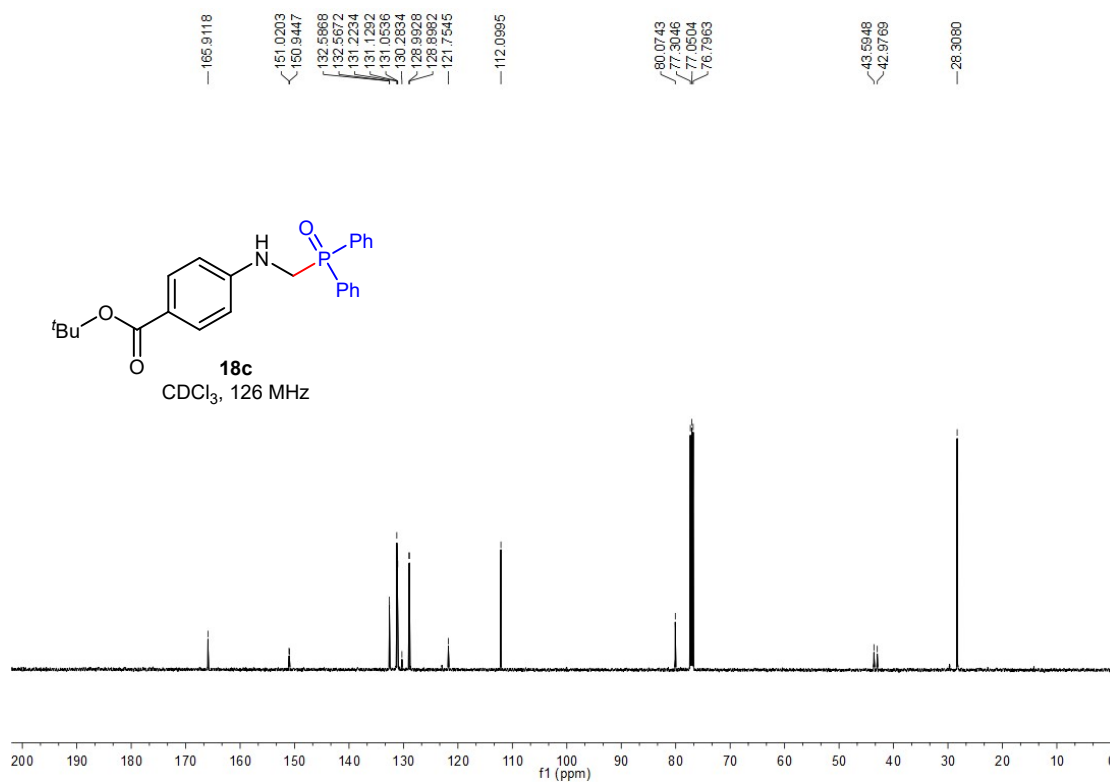



# 19c

## <sup>1</sup>H NMR

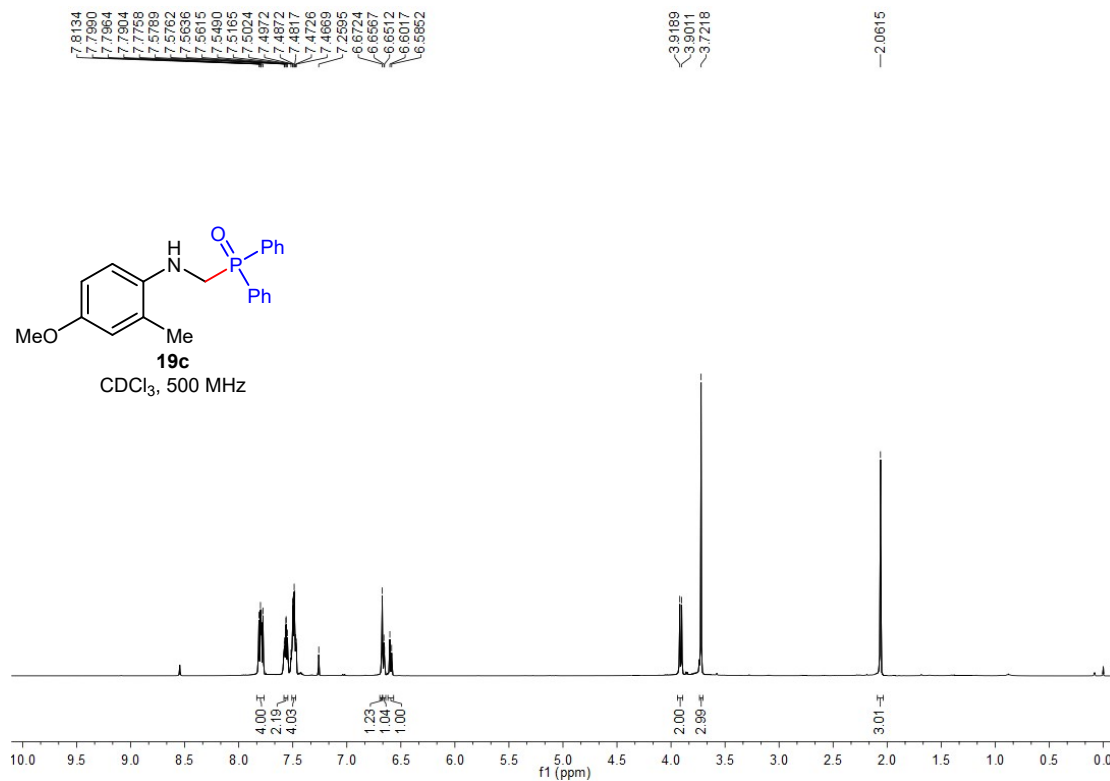

## <sup>13</sup>C NMR

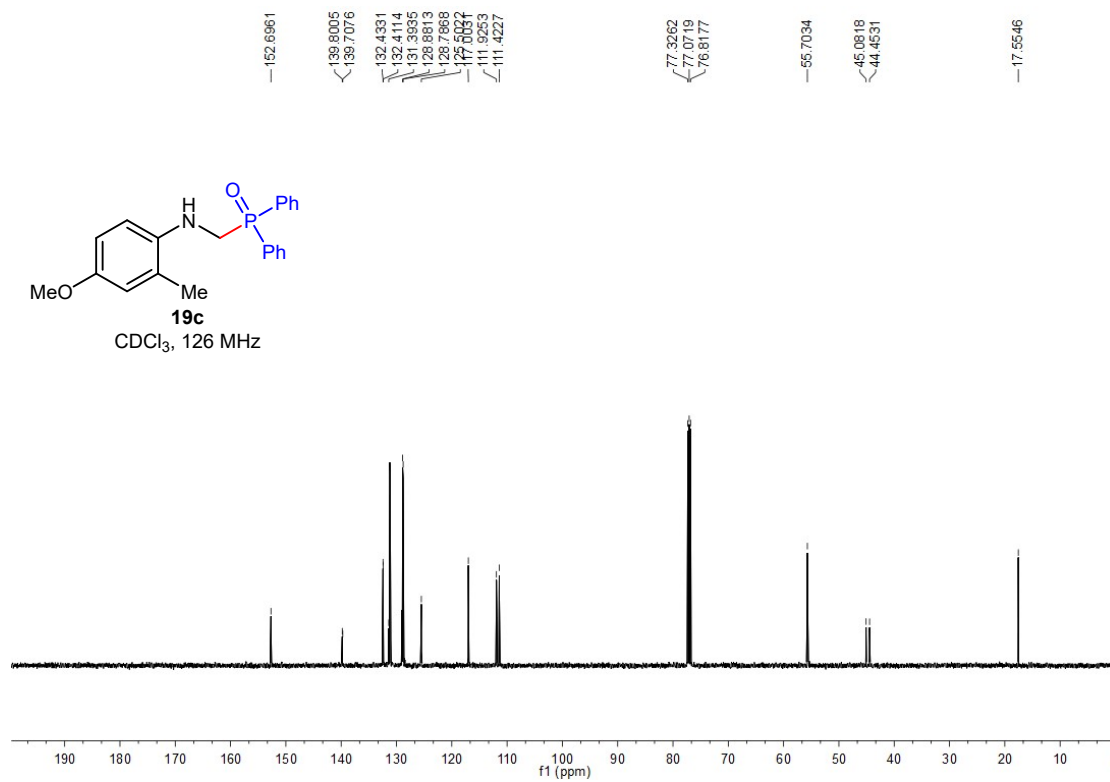

20c

<sup>1</sup>H NMR

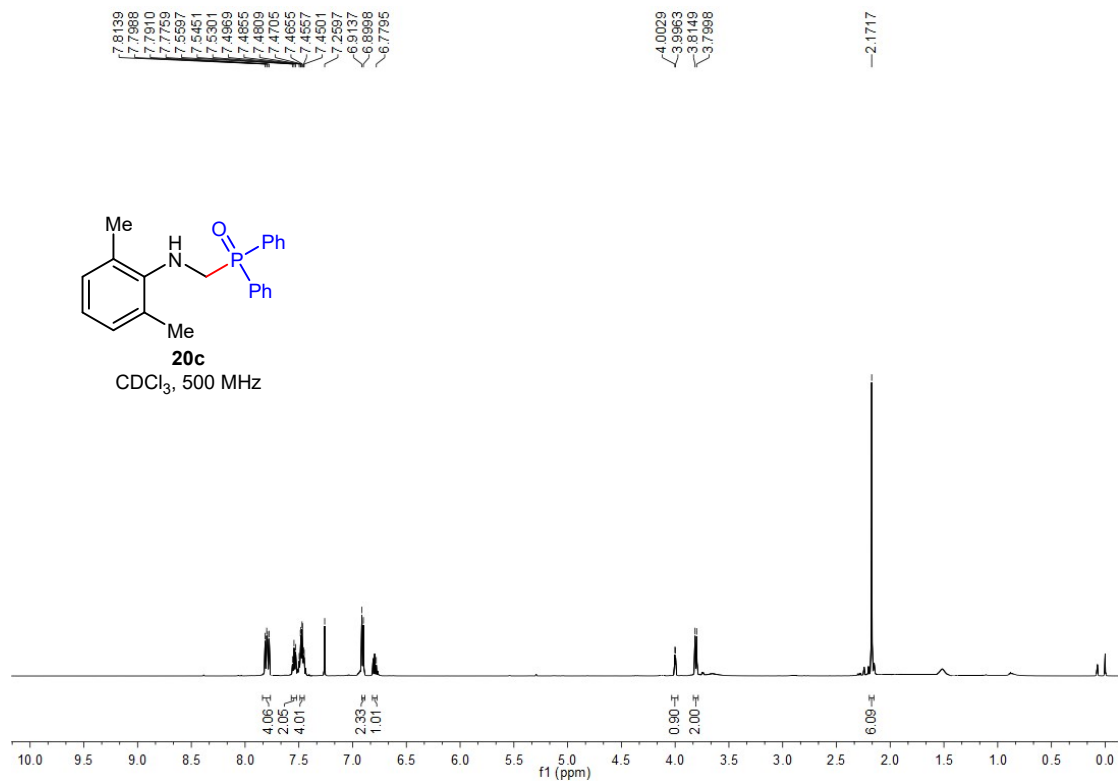

<sup>13</sup>C NMR

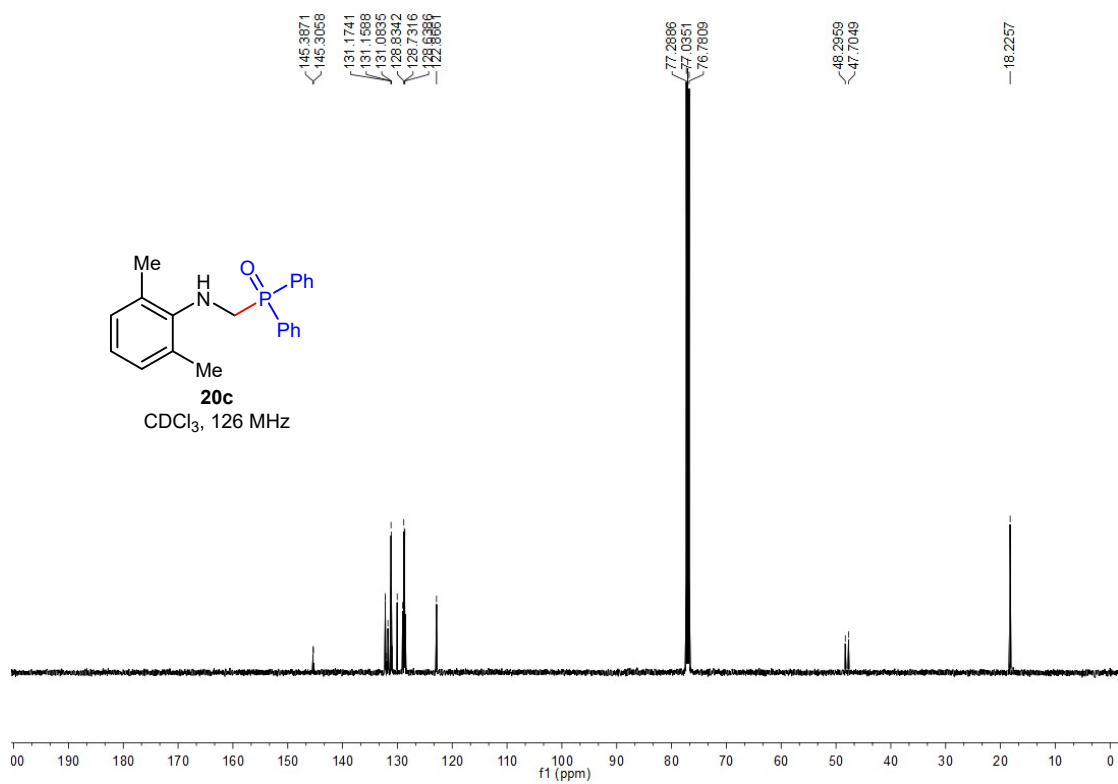

# 21c

## <sup>1</sup>H NMR

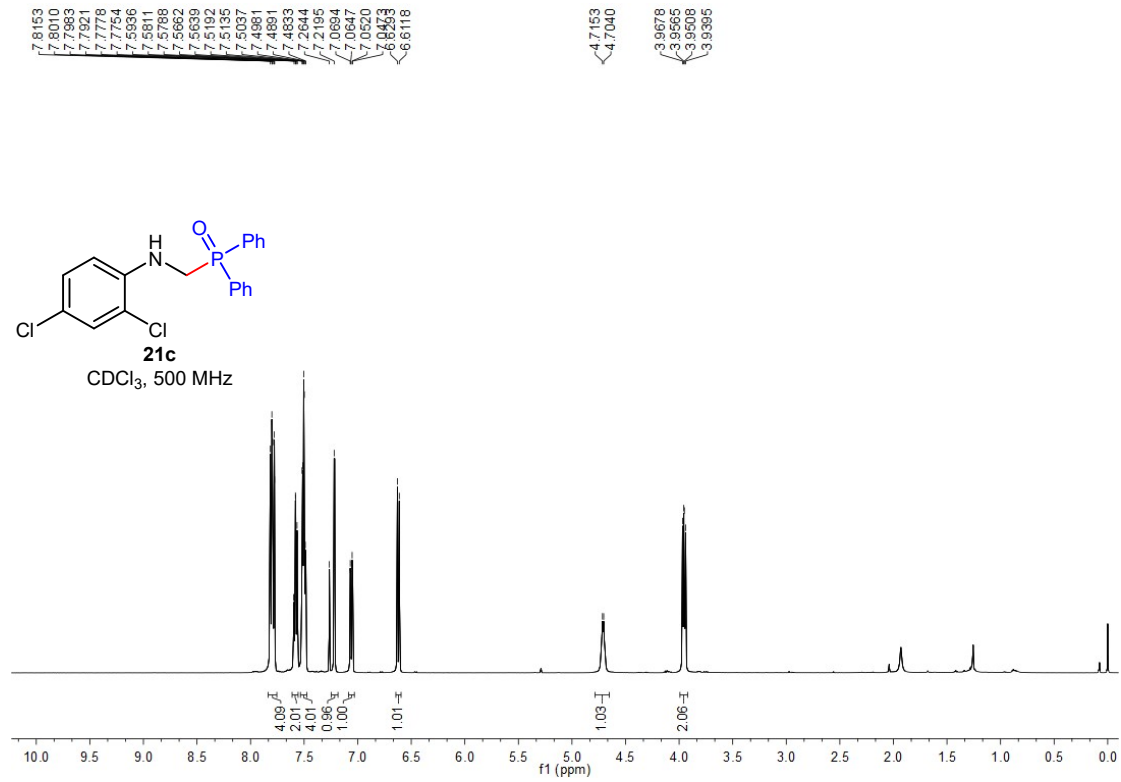

## <sup>13</sup>C NMR

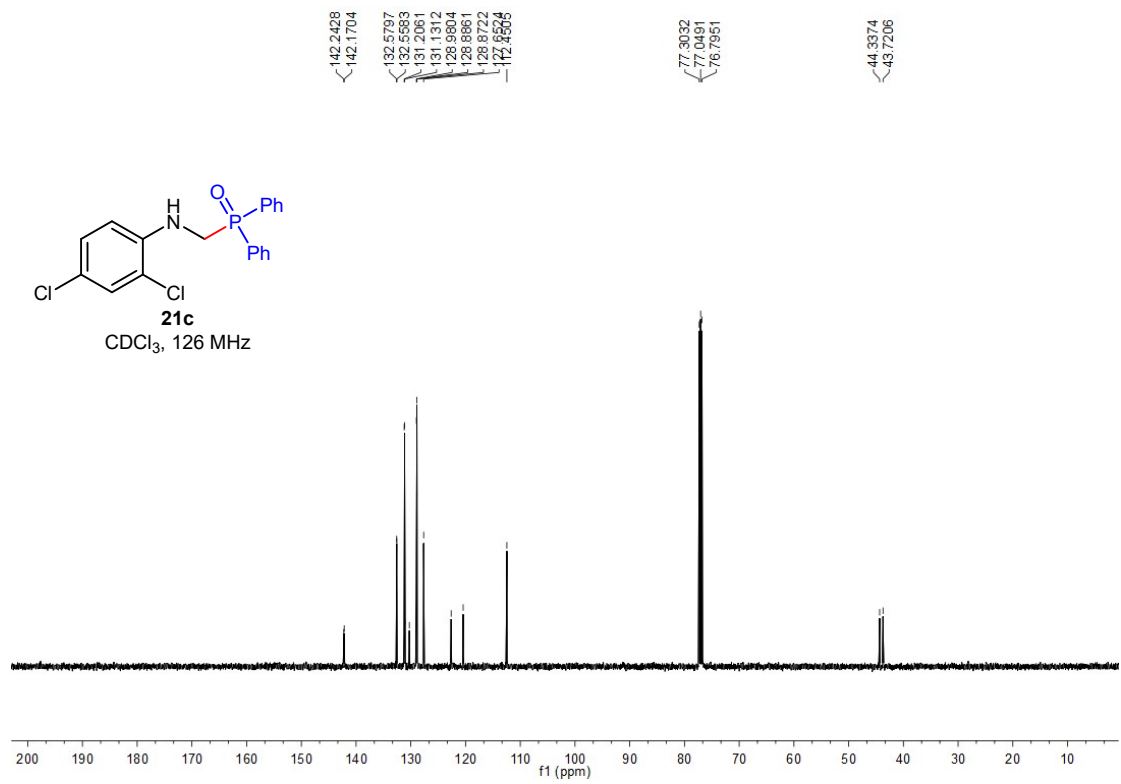

## 22c

<sup>1</sup>H NMR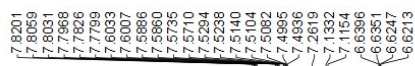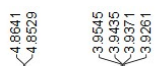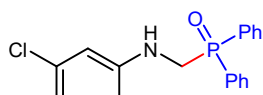

22c

CDCl<sub>3</sub>, 500 MHz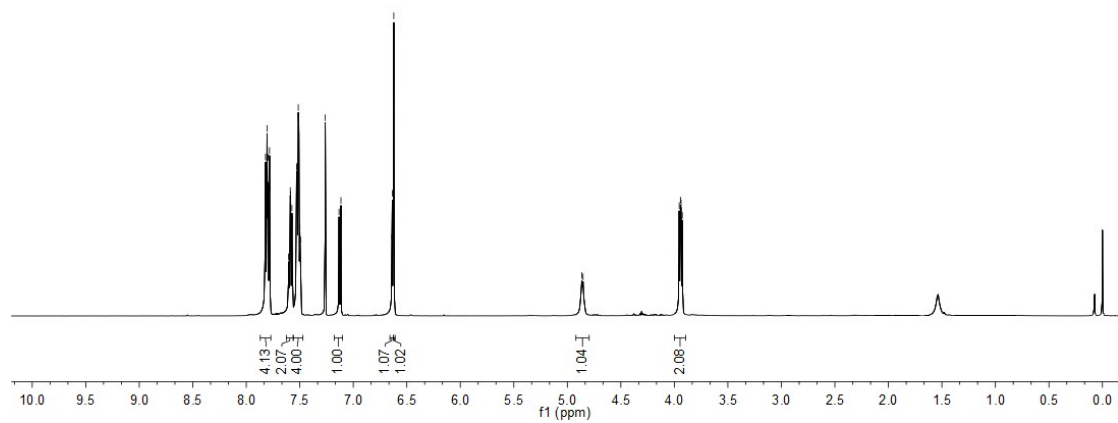<sup>13</sup>C NMR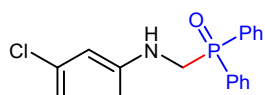

22c

CDCl<sub>3</sub>, 126 MHz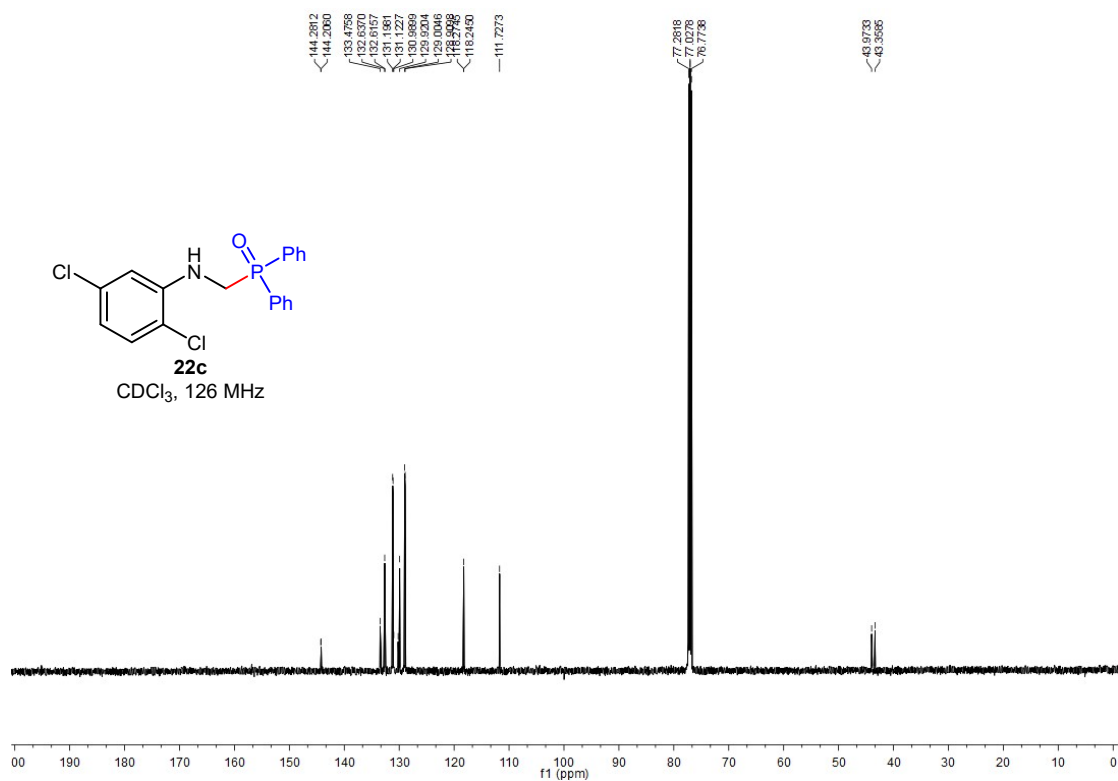

## 23c

<sup>1</sup>H NMR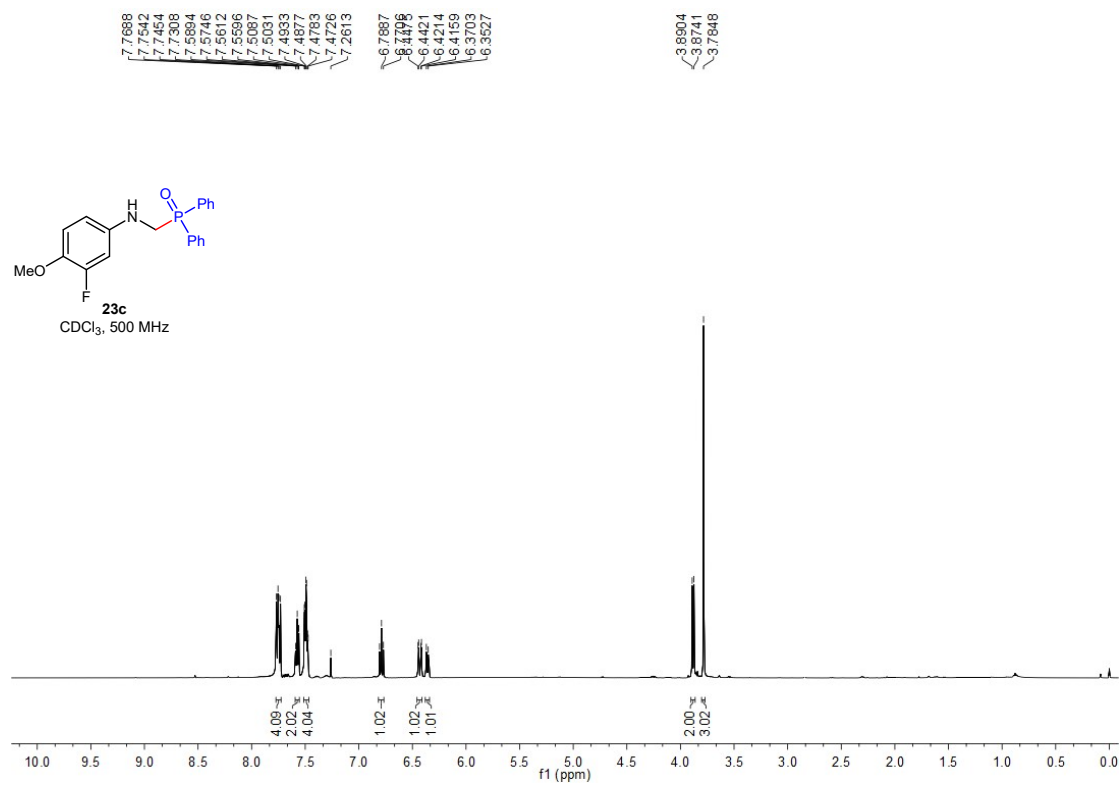<sup>13</sup>C NMR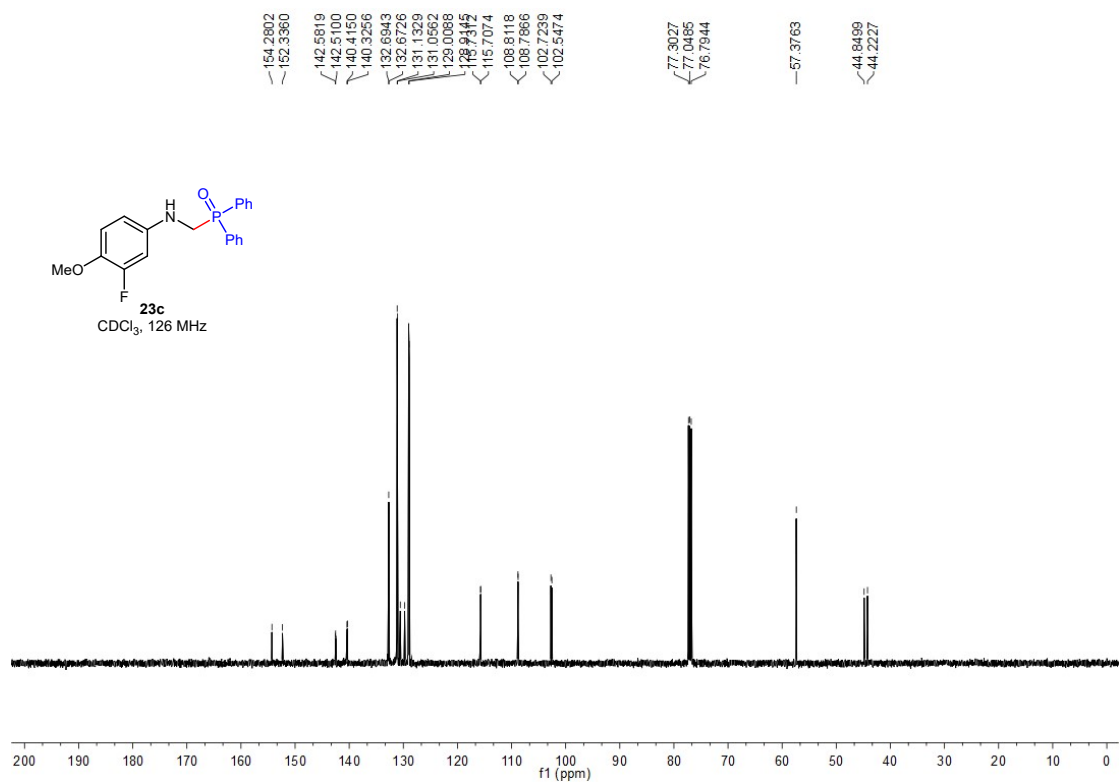

# <sup>19</sup>F NMR

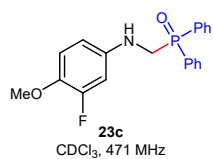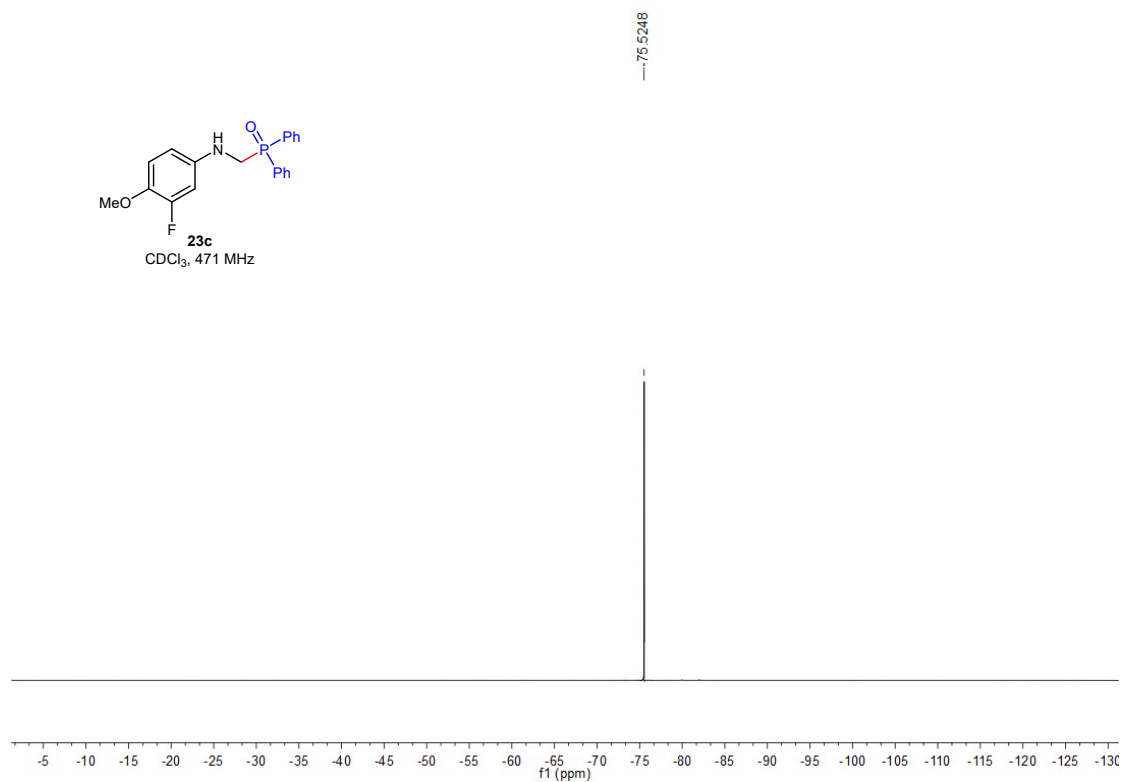

# <sup>1</sup>H NMR

## <sup>1</sup>H NMR

7.8303  
7.8289  
7.8244  
7.8115  
7.8085  
7.7924  
7.7869  
7.7599  
7.5221  
7.5195  
7.4803  
7.4752  
7.4649  
7.4614  
7.4595  
7.4505  
7.4448  
7.2604  
7.1465  
7.1318  
7.1148  
6.7059  
6.6872  
6.6603

4.2001  
4.1928

2.9329

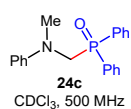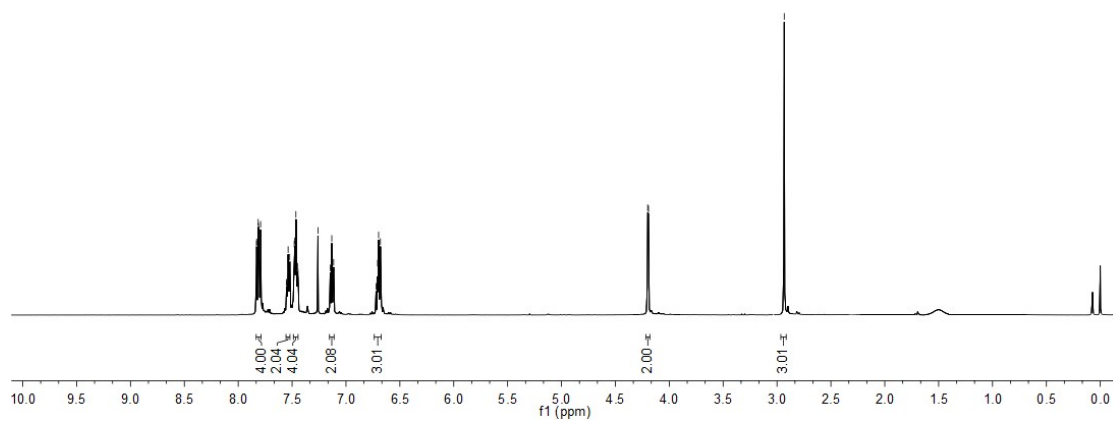

### <sup>13</sup>C NMR

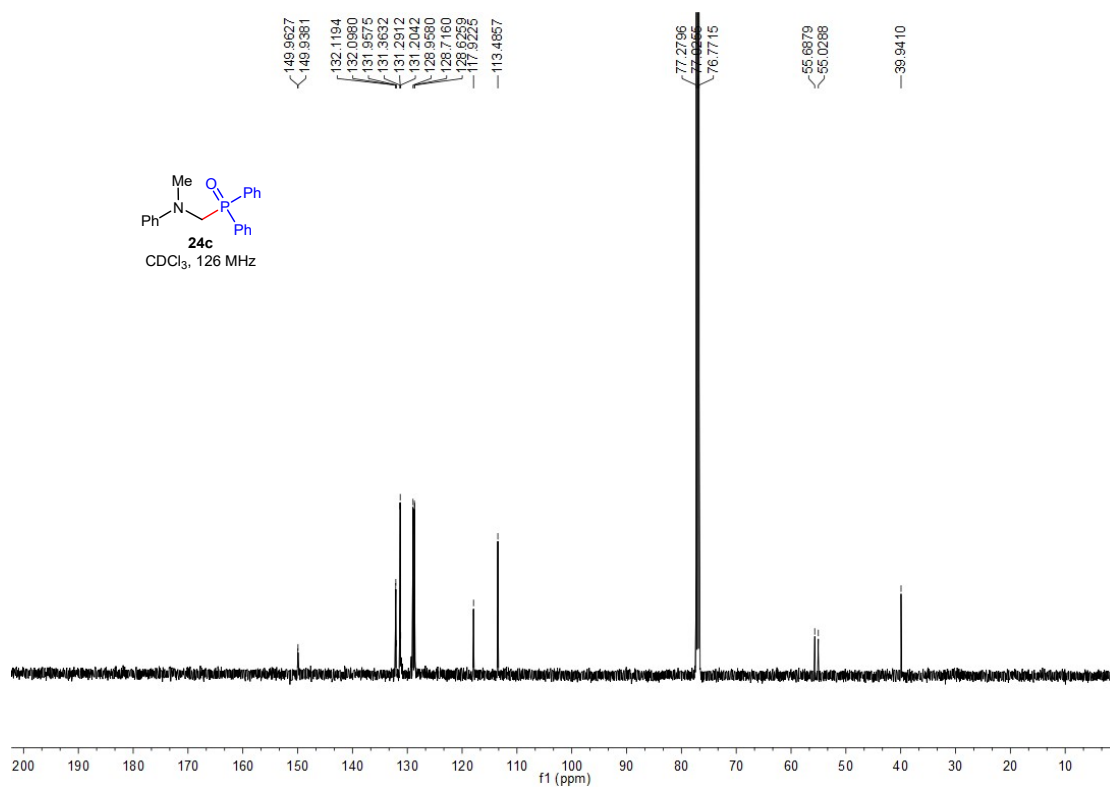

### **25c**

### <sup>1</sup>H NMR

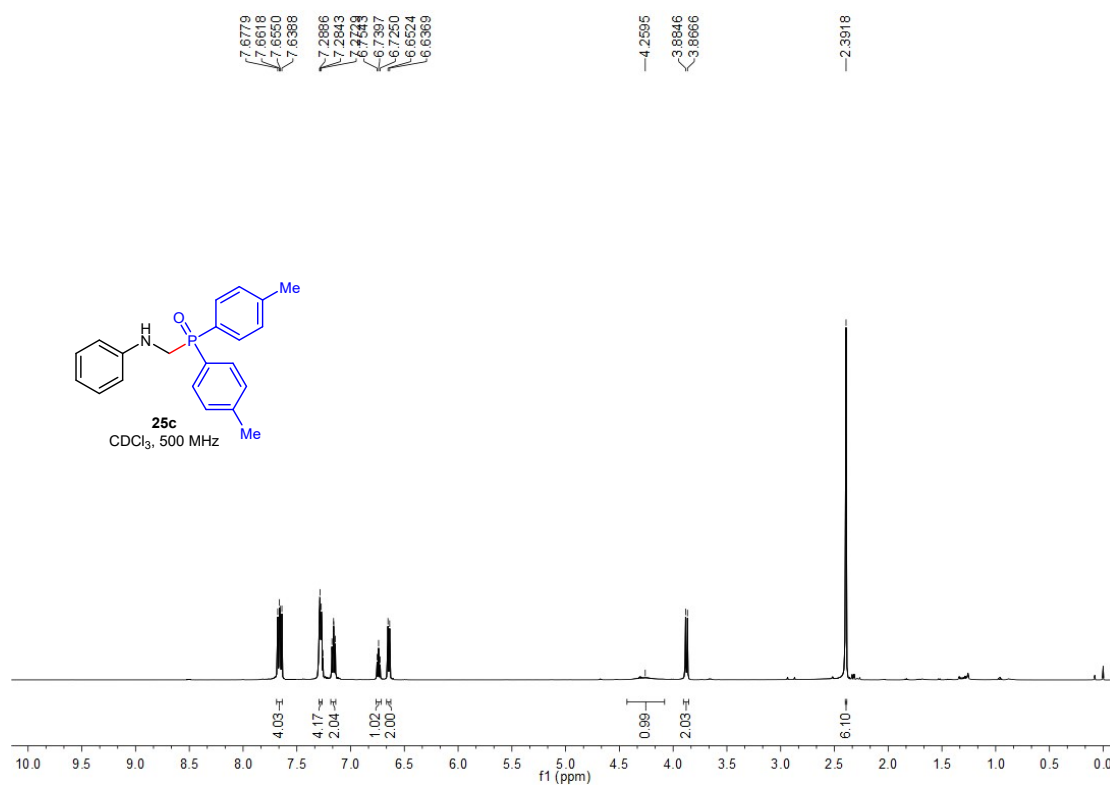

# <sup>13</sup>C NMR

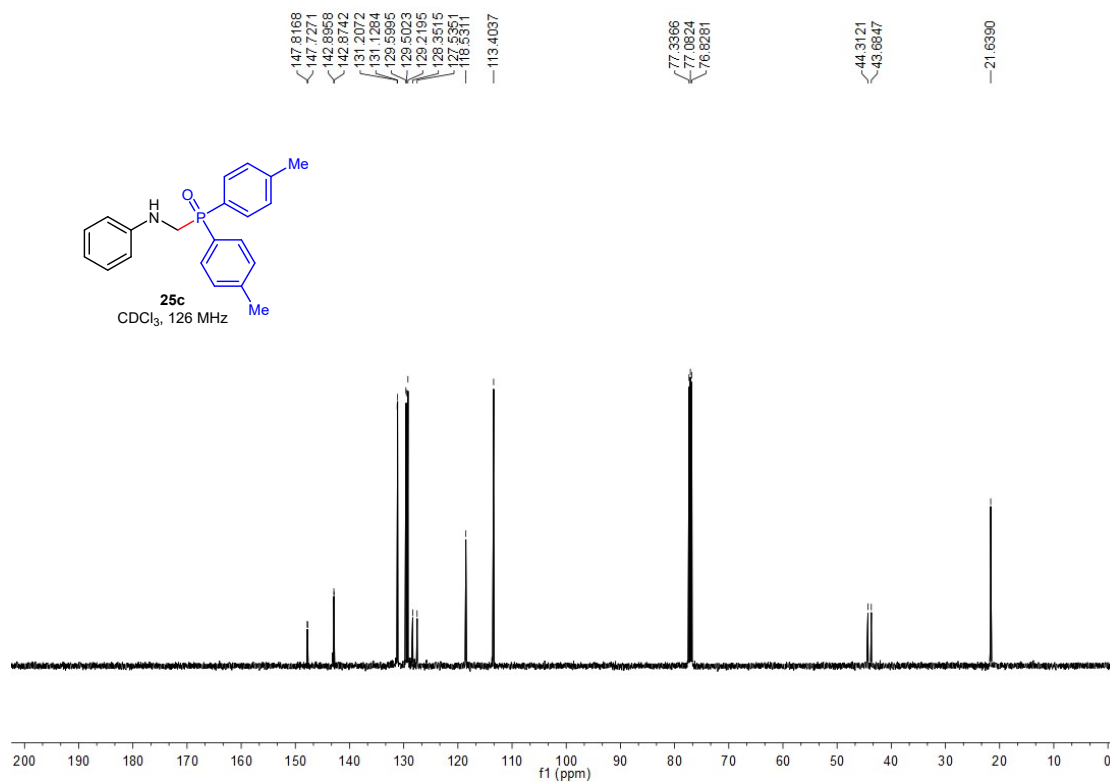

# 26c

# <sup>1</sup>H NMR

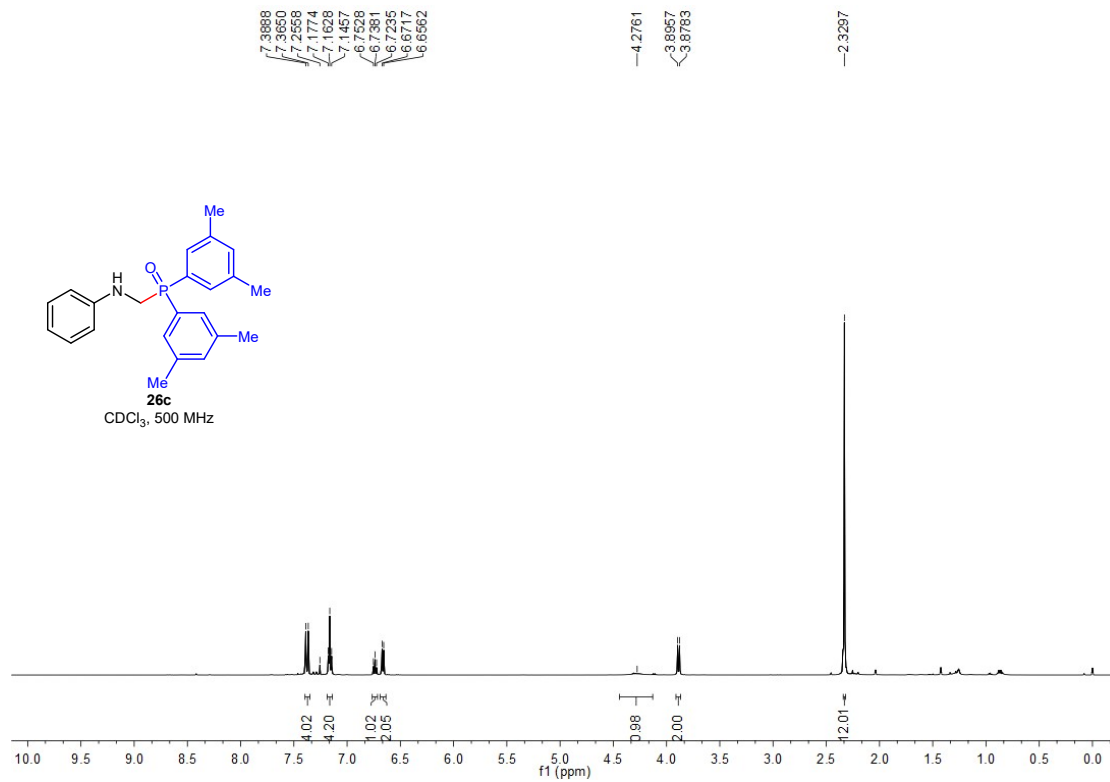





### <sup>13</sup>C NMR

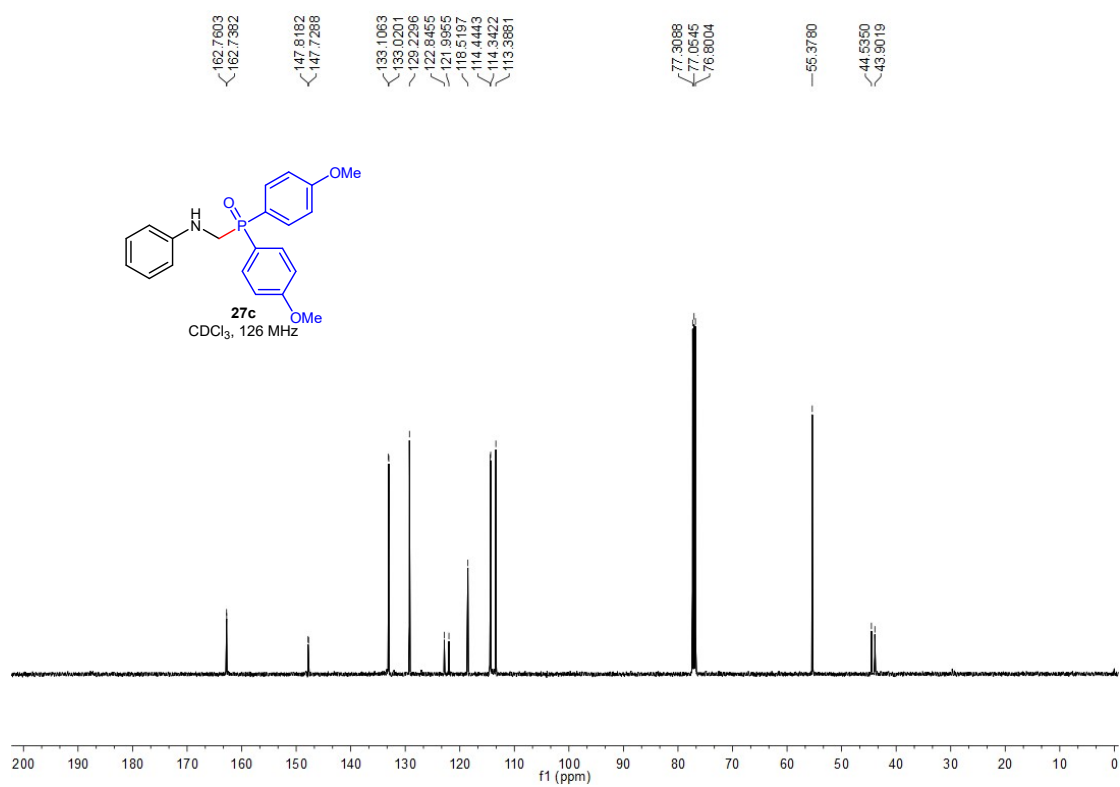

### **28c**

### <sup>1</sup>H NMR

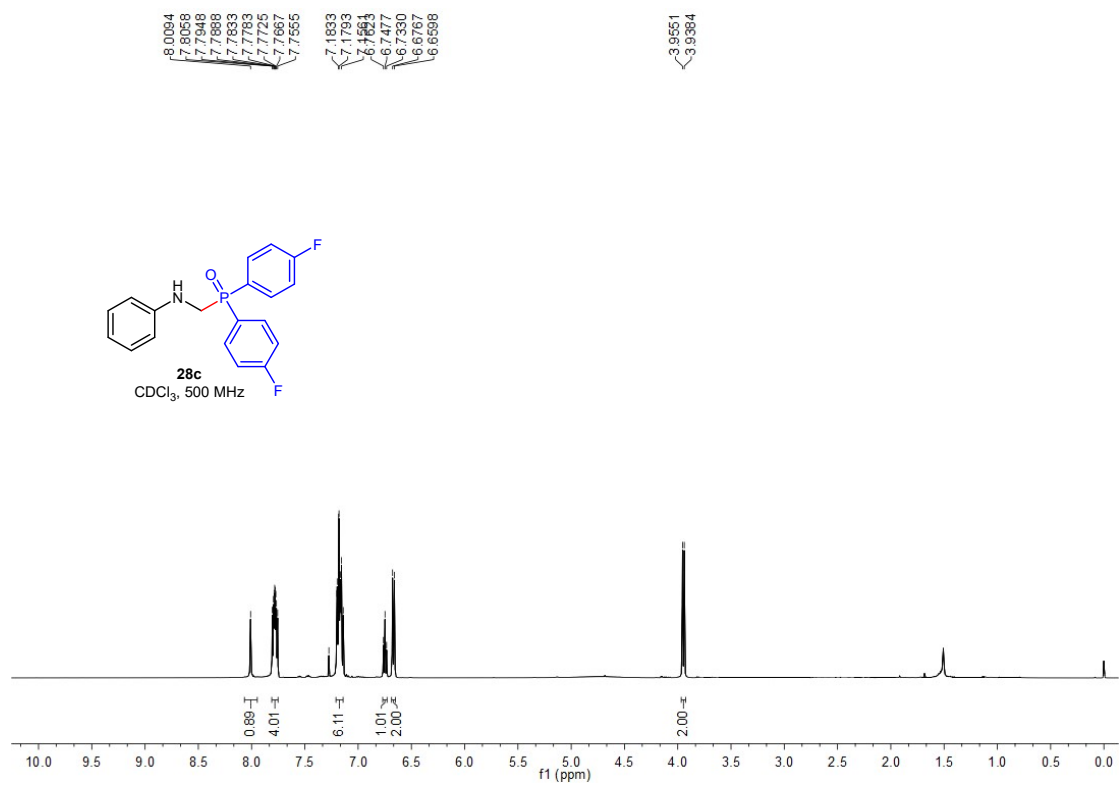

### <sup>13</sup>C NMR

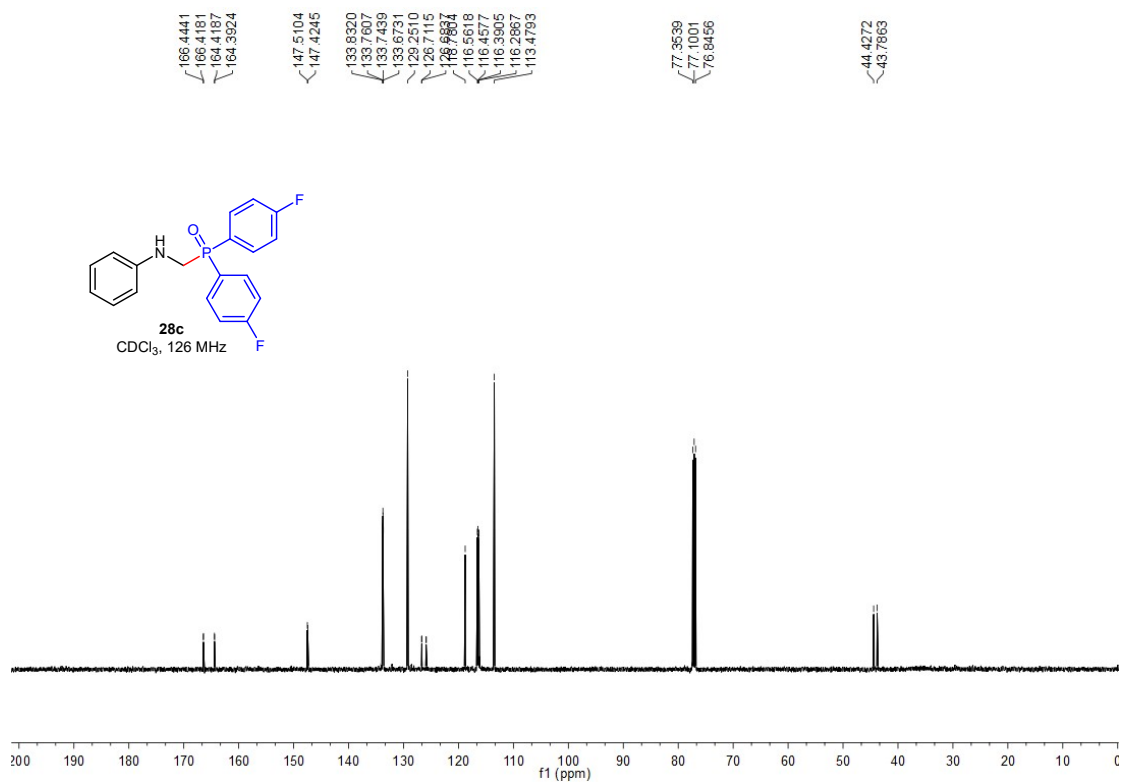

### <sup>19</sup>F NMR

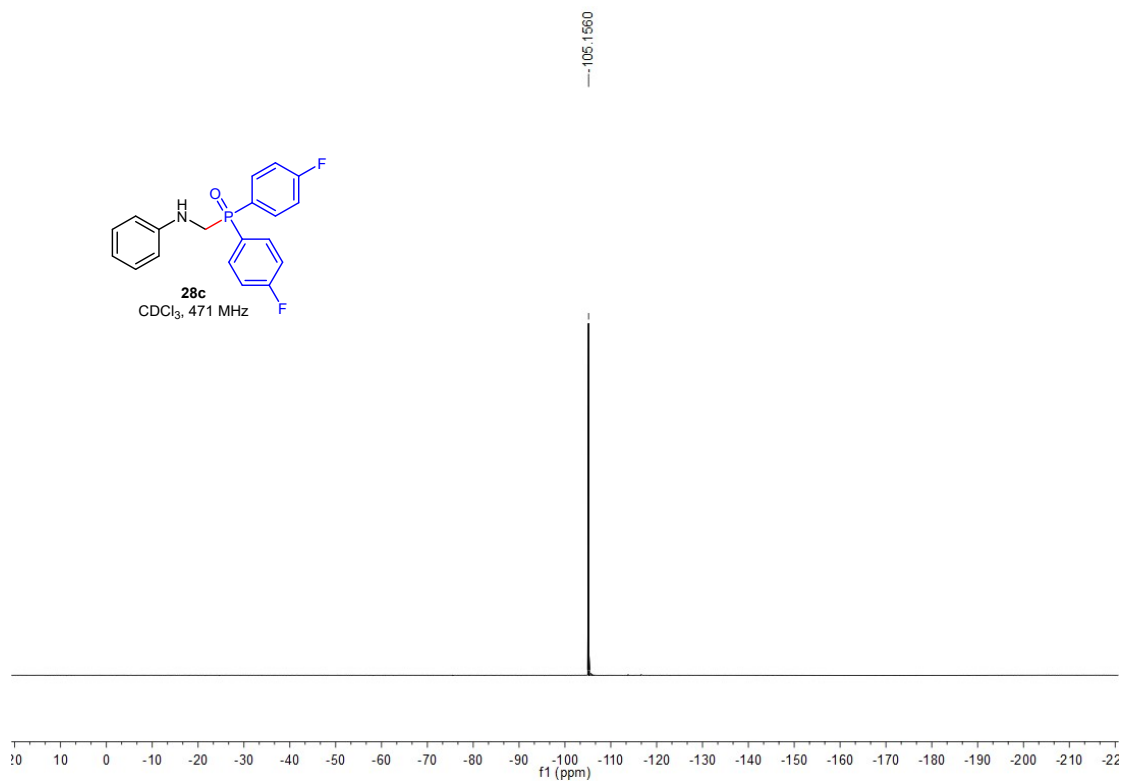

# 29c

## <sup>1</sup>H NMR

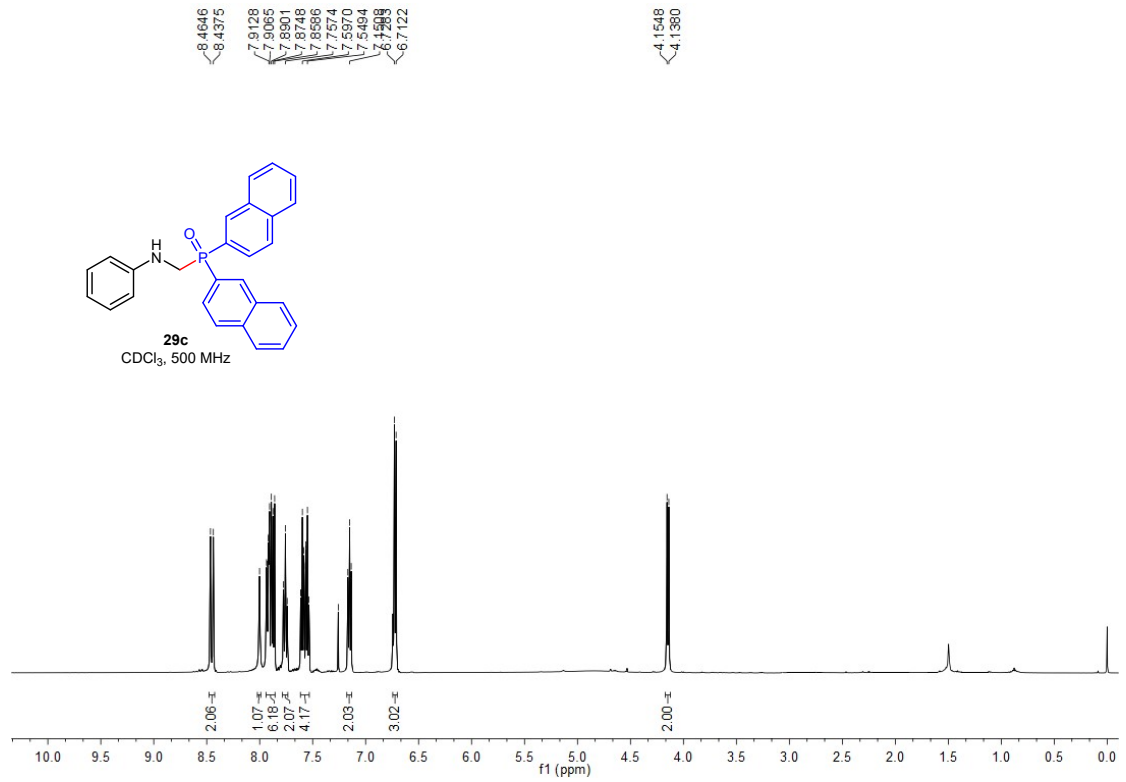

## <sup>13</sup>C NMR

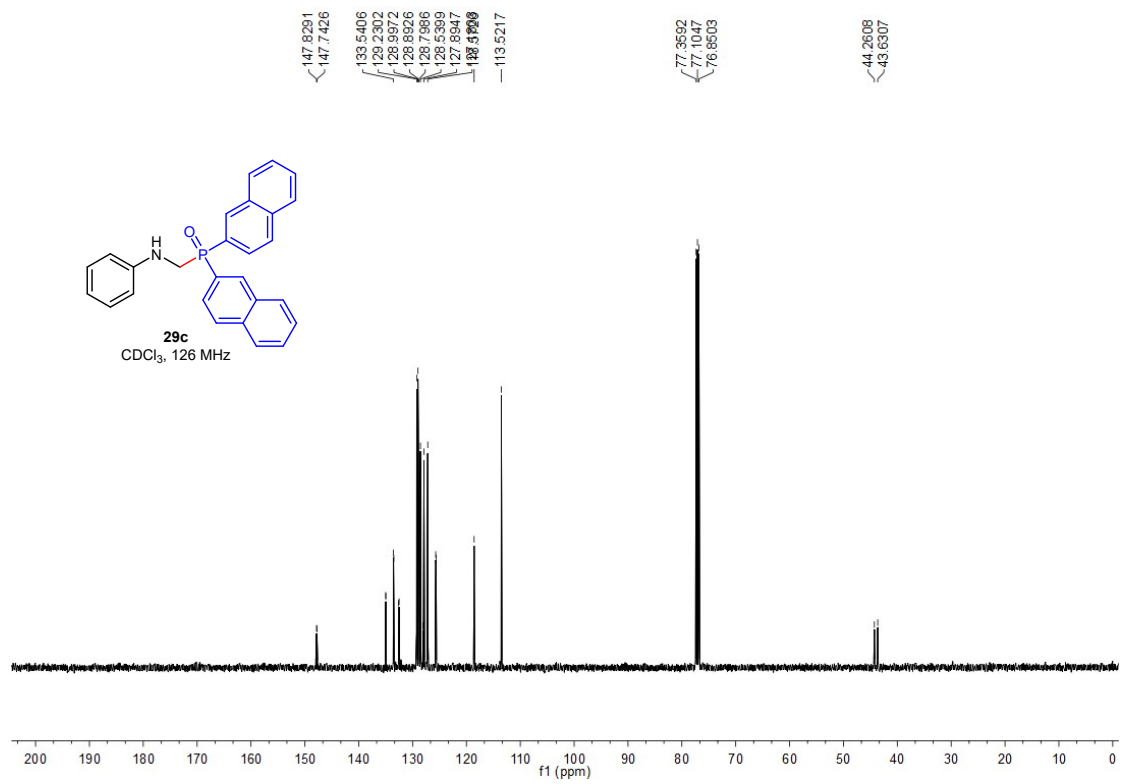

Supplement: d3qo01577g1.pdf [file d3qo01577g1.pdf]
